# Supplementary material for: Health and economic burden of respiratory syncytial virus (RSV) disease and the cost-effectiveness of potential interventions against RSV among children under 5 years in 72 Gavi-eligible countries
Source: PubMed Central journal article supplement (PMC7132892; doi:10.1186/s12916-020-01537-6), 2020-04-06
Supplement: 12916_2020_1537_MOESM1_ESM.pdf [file 12916_2020_1537_MOESM1_ESM.pdf]

## Additional file 1:

# Title: Health and economic burden of Respiratory Syncytial Virus (RSV) disease and the cost-effectiveness of potential interventions against RSV among children under 5 years in 72 Gavi-eligible countries

Authors: [Xiao Li](#)<sup>1</sup>, Lander Willem<sup>1</sup>, Marina Antillon<sup>1-3</sup>, Joke Bilcke<sup>1</sup>, Mark Jit<sup>4</sup>, Philippe Beutels<sup>1</sup>

<sup>1</sup> Centre for Health Economics Research & Modelling Infectious Diseases, Vaccine & Infectious Disease Institute, Universiteitsplein 1, University of Antwerp, Belgium

<sup>2</sup> Swiss Tropical and Public Health Institute, Socinstrasse 57, Basel Switzerland

<sup>3</sup> University of Basel, Petersplatz 1, Basel Switzerland

<sup>4</sup> Department of Infectious Disease Epidemiology, London school of Hygiene and Tropical Medicine, Keppel St, Bloomsbury, London, United Kingdom

### Table of Contents

|          |                                                                                           |           |
|----------|-------------------------------------------------------------------------------------------|-----------|
| <b>1</b> | <b>METHODS</b> .....                                                                      | <b>3</b>  |
| 1.1      | DISEASE BURDEN .....                                                                      | 3         |
| 1.2      | META-ANALYSIS OF RSV TREATMENT COSTS AND THE ADJUSTMENT FACTORS .....                     | 6         |
| <b>2</b> | <b>RESULTS</b> .....                                                                      | <b>10</b> |
| 2.1      | ESTIMATED RSV-ASSOCIATED DISEASE BURDEN AND THE IMPACT OF INTERVENTIONS AGAINST RSV ..... | 11        |
| 2.2      | EXPECTED VALUE OF PARTIALLY PERFECT INFORMATION (EVPI).....                               | 11        |
| 2.3      | SCENARIO ANALYSIS: USING POOLED HOSPITAL PROBABILITY .....                                | 18        |
| 2.4      | SCENARIO ANALYSIS: WITHOUT DISCOUNTING .....                                              | 20        |
| 2.5      | SCENARIO ANALYSIS: TRIAL-BASED VACCINE EFFICACY .....                                     | 22        |
| <b>3</b> | <b>REFERENCES</b> .....                                                                   | <b>27</b> |
| <b>4</b> | <b>LONG TABLES</b> .....                                                                  | <b>28</b> |

### Tables and Figures

|             |                                                                                                                   |    |
|-------------|-------------------------------------------------------------------------------------------------------------------|----|
| S. Table 1: | Estimated mean costs and health outcomes averted by RSV interventions using pooled hospital probability data..... | 18 |
| S. Table 2: | Estimated mean costs and health outcomes averted by RSV interventions using 0% discounting rate .....             | 20 |
| S. Table 3: | Reported vaccine efficacy in phase 3 Prepare <sup>TM</sup> trial .....                                            | 22 |
| S. Table 4: | Vaccine efficacy estimates for the trial-based scenarios .....                                                    | 23 |
| S. Table 5: | Estimated mean costs and health outcomes (in thousand) in children under 1 using trial-based-efficacy values..... | 24 |
| S. Table 6: | Estimated age-specific RSV cases in each country .....                                                            | 28 |
| S. Table 7: | Average outpatient and inpatient costs of the 72 Gavi countries in USD at 2016 value.....                         | 30 |

|                                                                                                                                              |    |
|----------------------------------------------------------------------------------------------------------------------------------------------|----|
| S. Table 8: Country-specific estimated mean of RSV-associated disease burden and the impact of interventions .....                           | 33 |
| S. Figure 1: Predictions from spline regressions of probability of death in among hospitalised patients.....                                 | 5  |
| S. Figure 2: Predictions from spline regressions of community-based incidence, probability of hospitalisation and probability of death ..... | 6  |
| S. Figure 3: Meta-analysis, outpatient adjustment ratio (log mean and log standard deviation).....                                           | 7  |
| S. Figure 4: Meta-analysis, inpatient adjustment ratio (log mean and log standard deviation) .....                                           | 8  |
| S. Figure 5: Meta-analysis, outpatient costs where multiple studies reported treatment costs (log mean and log standard deviation).....      | 9  |
| S. Figure 6: Meta-analysis, hospitalisation costs where multiple studies reported treatment costs (log mean and log standard deviation).10   |    |
| S. Figure 7: Expected Value of Partially Perfect Information (EVPI) of all 72 countries.....                                                 | 17 |
| S. Figure 8: Cost-effectiveness analysis when using pooled hospital probability data .....                                                   | 19 |
| S. Figure 9: Cost-effectiveness analysis when assuming a 0% discount rate. ....                                                              | 21 |
| S. Figure 10: Cost-effectiveness analysis for different scenarios related to the trial-based maternal vaccine efficacy.....                  | 26 |

# 1 Methods

## 1.1 Disease burden

Generalized additive mixed models (GAMM) were used to estimate the parameters of an interpolation spline for each of our outcomes of interest (cases, hospitalisations, and deaths among hospitalized individuals). Splines are flexible piece-wise defined functions used to describe and interpolate a response in scenarios when the process that gives rise to the data is ill-described by more traditional linear or log-linear functions. Smoothing splines circumvent the problem of having to select the number of pieces that an interpolant must have by penalizing for overly complicated functions [1].

The splines were built to decompose the variance in the data into two components: a global trend using a fixed-effect spline, and a study-specific trend using random-effect splines that accounts for the difference between the age-related trend in each study and the trends observed globally. Three splines were estimated: I) community-based incidence, II) hospital probability, III) probability of death among hospitalized patients. The flexibility of the GAMM framework allowed us to model the incidence spline (I) assuming a Poisson process, and the probability splines (II and III) assuming a binomial process.

The structure of functions are as follows:

For incidence (assuming a Poisson function):

$$\log(\text{cases/population}) \sim \alpha_0 + \alpha_i + s(\log(\text{age})) + s(\log(\text{age}), \text{study}_i)$$

Traditionally, the combination of a property of log functions means that the population element is put in the right-hand side as a predictor constrained to have a coefficient equal to one (called an “offset”):

$$\log(\text{cases}) - \log(\text{population}) \sim \alpha_0 + \alpha_i + s(\log(\text{age})) + s(\log(\text{age}), \text{study}_i)$$

$$\log(\text{cases}) \sim \alpha_0 + \alpha_i + s(\log(\text{age})) + s(\log(\text{age}), \text{study}_i) + \text{offset}[\log(\text{population})]$$

For probabilities (splines II and III) assuming a binomial process:

$$\text{logit}(p) \sim \alpha_0 + \alpha_i + s(\log(\text{age})) + s(\log(\text{age}), \text{study}_i)$$

25  $\alpha_0$  is the overall intercept (the probability of hospitalisation or death at age 0)

26  $\alpha_i$  study-specific random effect on the intercept.

27  $s(\log(\text{age}))$  a global trend (fixed-effect) spline for the correlation between the outcome and age,  
28 constructed with a thin-plate spline.

29  $s(\log(\text{age}), \text{study}_i)$  a set of random-effects splines constructed with a tensor product basis that used  
30 a combination of a thin-plate spline and a random-effects basis to construct splines.

31 Age groups were mapped onto the number line by assigning the midpoint of the age group as the age  
32 that would be put into the model (i.e., observations of a group of 0-3 month-old children were  
33 considered to be the observations of children 1.5 month-old children). The age values were log-  
34 transformed because the data exists at a higher resolution in the younger ages than in the older ages,  
35 and this would allow us to estimate splines with knots that are approximately equally spaced. We  
36 discarded studies that had fewer than three studies, as no age-curve would be possible other than a  
37 straight line.

38 The shape of the curve is determined by two components: 1) the number of “knots”, or places when  
39 the curve changes direction or convexity, and 2) the “smoothing” parameter, which constrains the  
40 number of grooves and inflections that a curve may have. The smoothing parameter is fit as part of a  
41 penalty term on the objective function. The penalty term is given by the second derivative of the model,  
42 thus penalizing for more intricate curves. Thin-plate splines were used in order to avoid selecting a  
43 basis (b-spline, cubic spline). The penalty term in the smoothing splines circumvents the need to find  
44 the ideal number or location of knots in each regression model. The selection of the smoothing  
45 parameter of the penalty term is done through k-fold cross-validation (in which one or more data-  
46 points are left out to estimate parameters and the resulting model is scored for its capacity to predict  
47 the data points that are left out).

48 We used a “shrinkage” variant of the thin-plate spline, which “shrinks” the spline towards a straight  
49 line; in other words, the algorithm encourages shapes that are as close to a straight line as is sensible  
50 unless there is strong evidence that an alternative shape is warranted, thus avoiding overly complex

51 curves to describe such diverse settings as the GAVI 72 countries. This was especially important for  
52 the probability of death splines, which were sometimes prone to unusual shapes to capture the few  
53 deaths that were observed in the data.

54 A tensor product basis was used to construct the random-effect splines specific to each study. Such  
55 a spline was the interaction of thin-plate splines and random-effect parametric terms that were  
56 assumed to be normally distributed (a ridge penalty).

57 S. Figure 1 demonstrates the prediction splines for hospital case fatality rate (hCFR). The light pink  
58 bands show the splines derived from GAM models for LIC and LMIC. The blue bands present pooled  
59 splines from both LIC and LMIC. The solid lines represent the expected mean of the setting-specific  
60 splines. We used the splines of LMIC settings in the main analysis, because of the more explicit age-  
61 specific pattern among infants under 6 months, in line with the literature [2, 3].

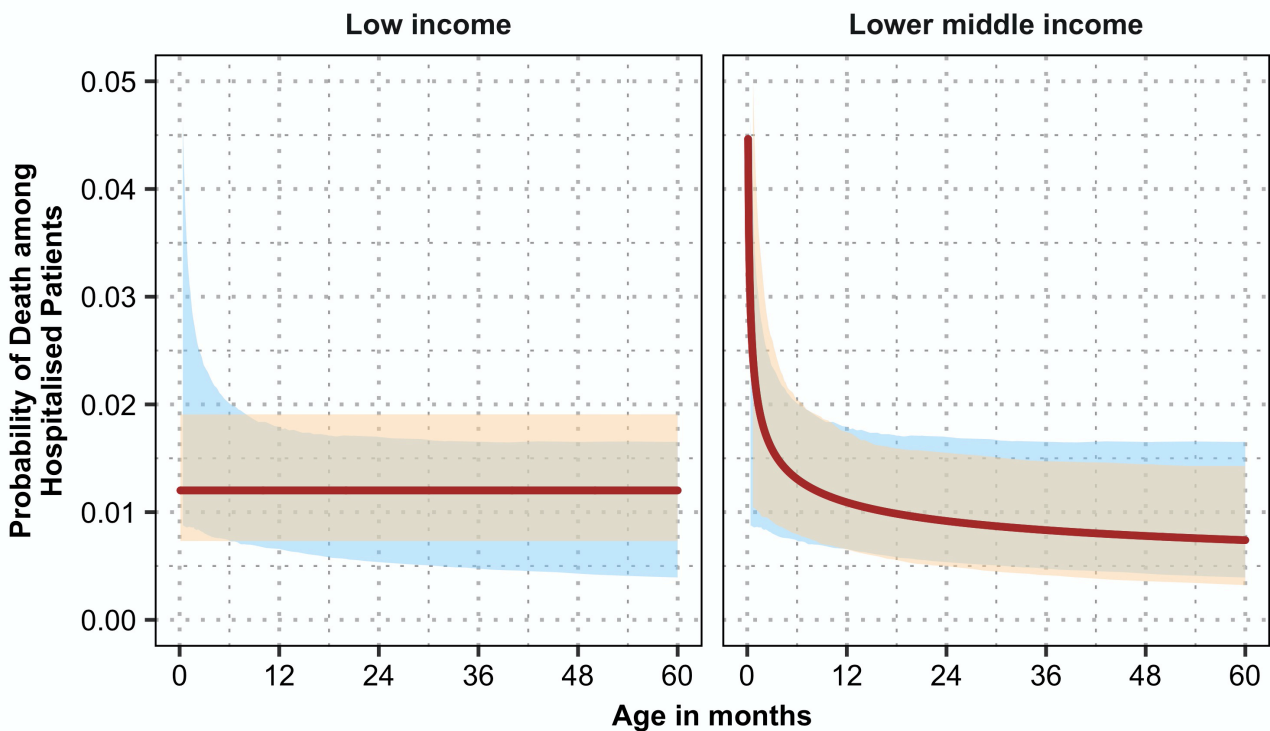

62

63 *S. Figure 1: Predictions from spline regressions of probability of death in among hospitalised patients*

64 The bands correspond to the 95% confidence intervals of hospital case fatality ratio at each age. Probability of death using data from LIC and LMIC (in yellow)  
65 and the pooled analysis were shown (in blue). The solid red line presents the expected mean. The pink band in the LMIC was used in the model for the main  
66 analysis.

70 S. Figure 2 shows the three prediction splines. The pink bands present the splines that derived from  
 71 GAM models. The blue bands present “Nokes 2008 only” splines in the S. Figure 2 (b) [4]. The solid  
 72 lines represent the expected mean at each age.

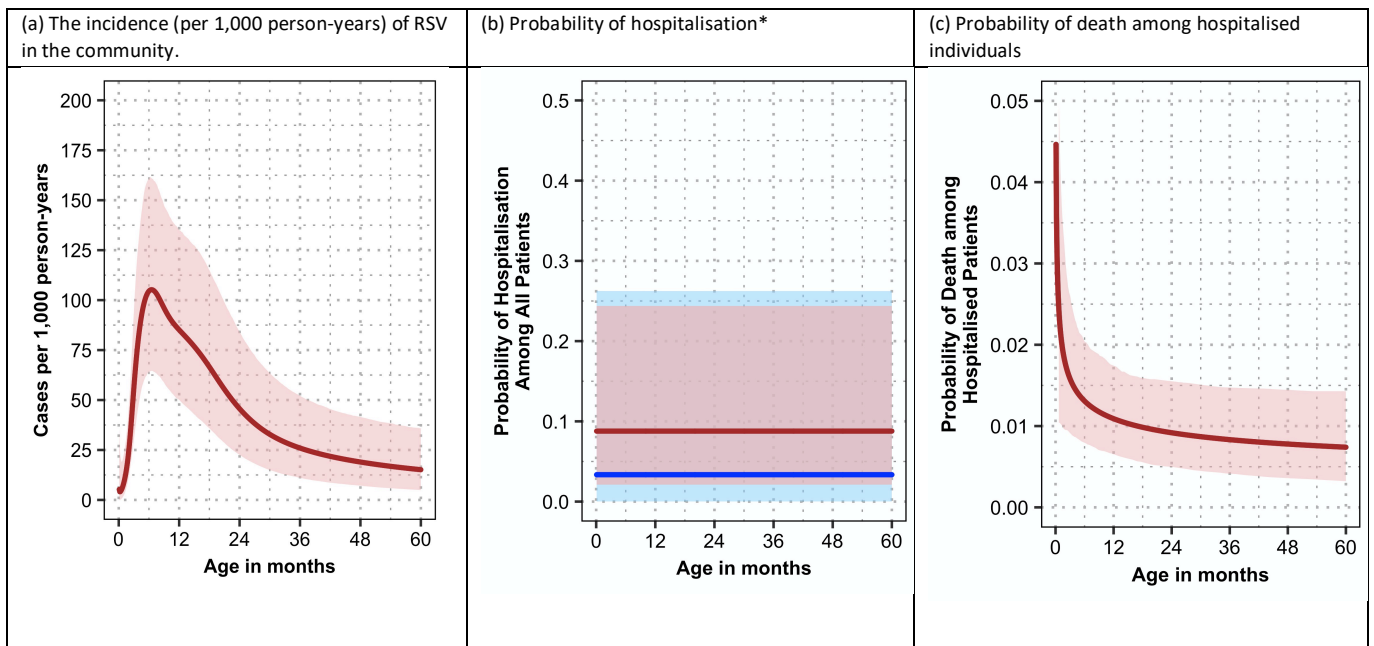

71 *S. Figure 2: Predictions from spline regressions of community-based incidence, probability of hospitalisation and probability*  
 72 *of death*

73 The bands correspond to the 95% confidence intervals of each parameter at each age. \* Probability of hospitalisation using data from one LMIC where  
 74 hospitalisations (in pink) and from two LMICs: Bangladesh and Kenya [4, 5] (in blue) were actually observed. The pink band was from the model used for the  
 75 main analysis and the blue band was from the model used for the supplemental analysis.

76 Long tables S. Table 6 listed the mean of estimated age-specific RSV cases in each country.

## 77 1.2 Meta-analysis of RSV treatment costs and the adjustment factors

78 Firstly, based on the WHO-CHOICE estimates, gamma distributions were assigned for both outpatient  
 79 costs (H1 hospital) per visit and inpatient costs (H2 hospital) per day, where we assume  $\alpha = \mu^2/s^2$ ;  $\beta =$   
 80  $s^2/\mu$  following the method of moments ( $\mu$  is the mean and  $s$  is the standard error, not the standard  
 81 deviation, of the cost) [6, 7]. Then the country-specific length of stay (LoS) data were retrieved from  
 82 the systematic review and multiplied with the inpatient cost per day [8]. If there is no country-specific  
 83 LoS data available, the global mean LoS of 5.8 (95% CI 5.3-6.4) days was applied. Gamma  
 84 distributions were fitted and 5,000 simulations were drawn.

85 Secondly, pneumonia treatment costs (used as a proxy for RSV associated ALRI) were extracted  
 86 from the systematic review [8] and a gamma distribution was also applied following the same rules as  
 87 above. Although the published studies were reported from different perspectives (i.e. health care  
 88 payer, household, societal), only the reported direct treatment costs were used in the meta-analysis.  
 89 The outpatients (OP) and inpatients (H) ratios were calculated as shown below:

90 
$$OP\ ratio = \text{systematic review outpatient costs} / \text{WHO-CHOICE outpatient estimates}$$

91 
$$H\ ratio = \text{systematic review inpatient costs} / (\text{WHO-CHOICE inpatient estimate per day} * LOS)$$

92 Thirdly, meta-analyses for both ratios were performed and the results were presented in S. Figure 3  
 93 and S. Figure 4. The overall OP adjustment ratio was 21.8 (95% CI 8.0-59.15) and H adjustment ratio  
 94 was 3.1 (95% CI 2.1-4.7). Therefore, for countries where no country-specific data were identified in  
 95 the systematic review, the WHO-CHOICE outpatient and inpatients costs were adjusted using these  
 96 adjustment factors.

97 Finally, for the countries where multiple studies were identified in the review, meta-analyses were  
 98 performed to calculate a single treatment cost estimate for the county (S. Figure 5 and S. Figure 6).

99 Both inpatient and outpatient costs in the 72 countries were listed in S. Table 7.

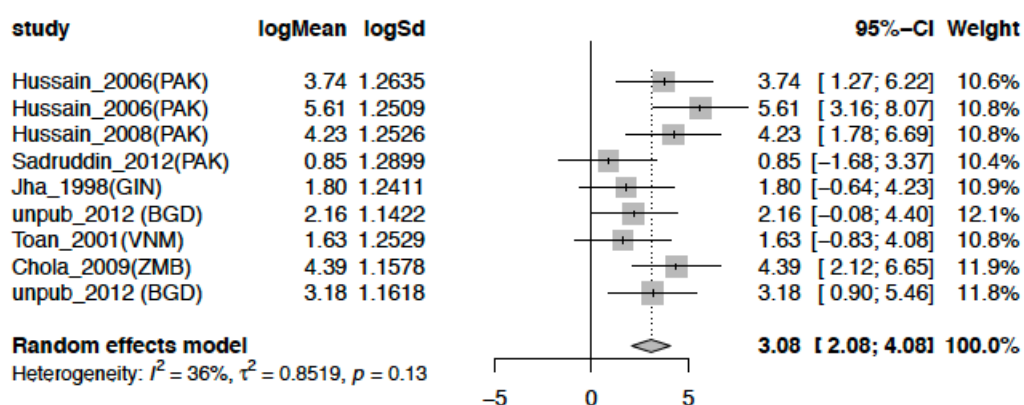

100

101 *S. Figure 3: Meta-analysis, outpatient adjustment ratio (log mean and log standard deviation)*

102

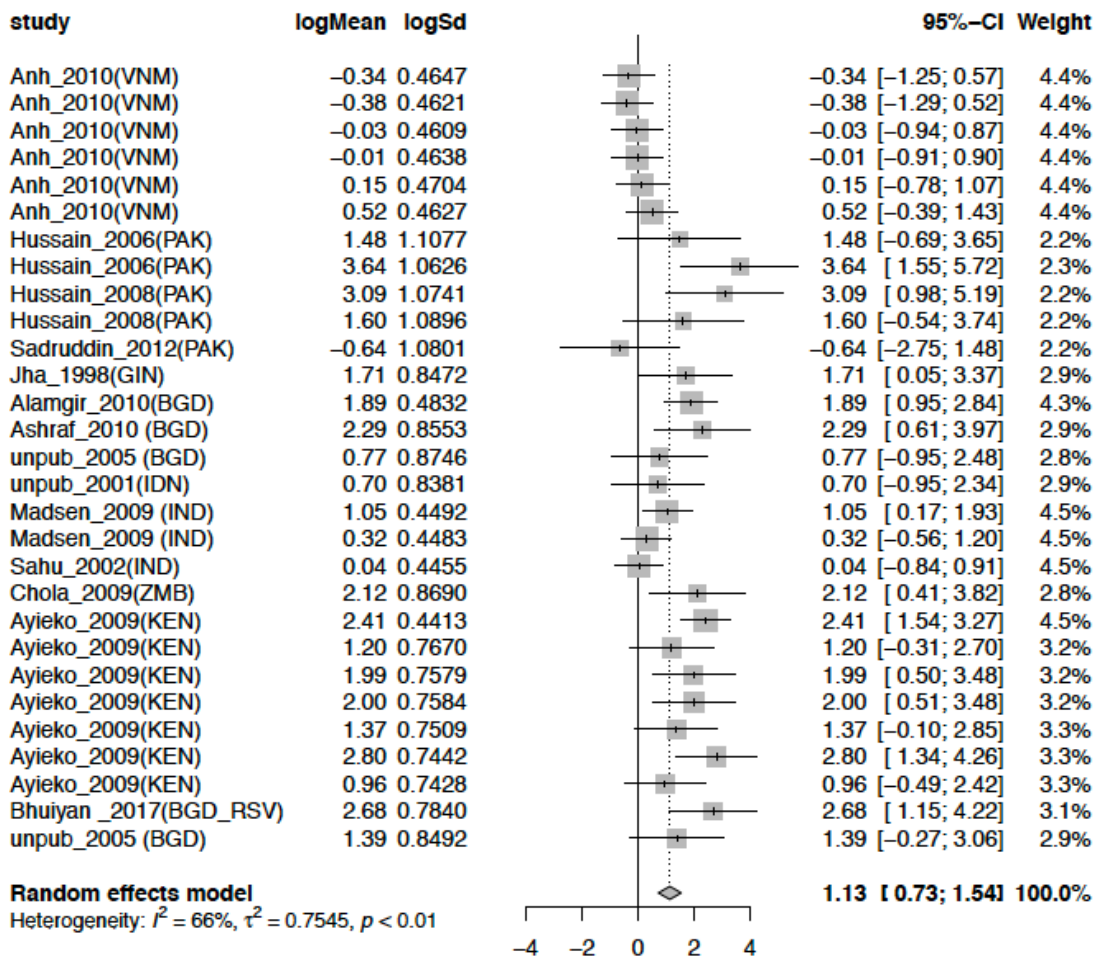

103

104 S. Figure 4: Meta-analysis, inpatient adjustment ratio (log mean and log standard deviation)



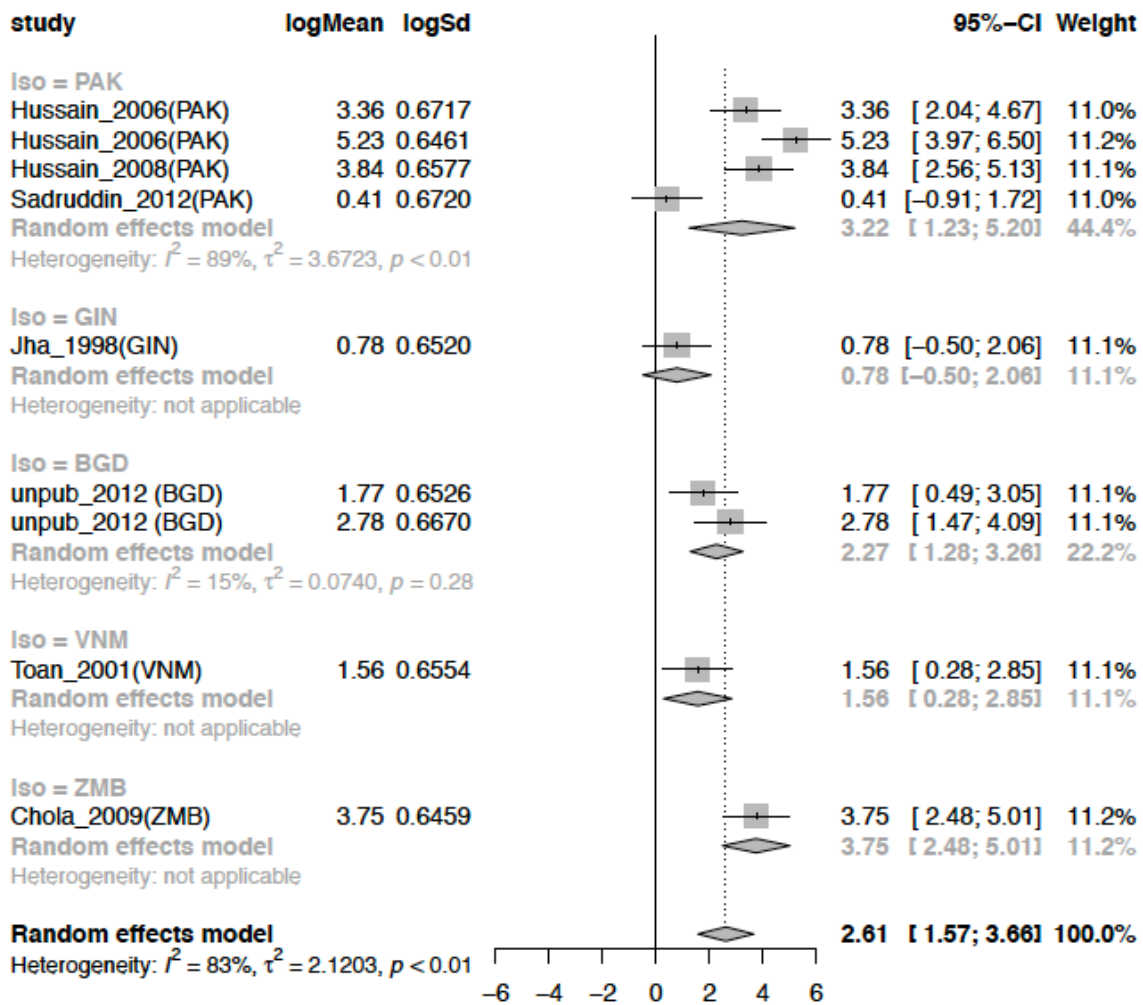

105

106 *S. Figure 5: Meta-analysis, outpatient costs where multiple studies reported treatment costs (log mean and log standard*  
 107 *deviation)*

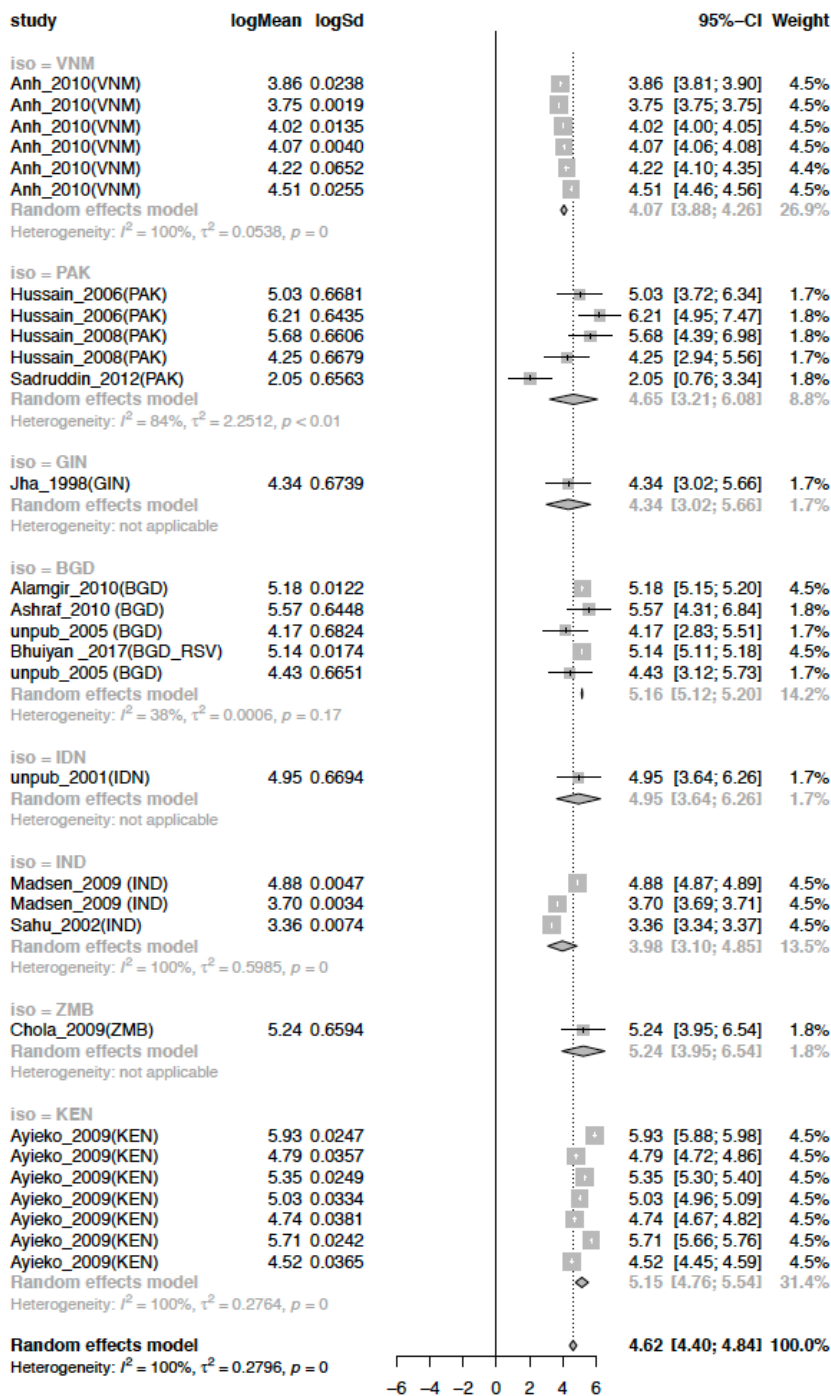

108

109 *S. Figure 6: Meta-analysis, hospitalisation costs where multiple studies reported treatment costs (log mean and log standard*  
 110 *deviation)*

## 111 2 Results

112 Country-specific burden of disease estimates and scenario analyses results are reported in this  
 113 section.

114 **2.1 Estimated RSV-associated disease burden and the impact of interventions**  
115 **against RSV**

116 Table 2 in the main text (section disease burden) reports the aggregated RSV-associated disease  
117 burden pre-and post RSV intervention over 72 Gavi countries. S. Table 8 lists the country-specific  
118 results and the average cost-effectiveness ratio, comparing the mAb and maternal strategies with no  
119 intervention.

120 **2.2 Expected Value of Partially Perfect Information (EVPPPI)**

121 The EVPPPI demonstrated how valuable obtaining perfect information about this input parameter  
122 would be. A selection of three countries are presented in the main text (Figure 4 and section EVPPPI),  
123 whereas all 72 country specific EVPPPI graphs are presented in S. Figure 7.

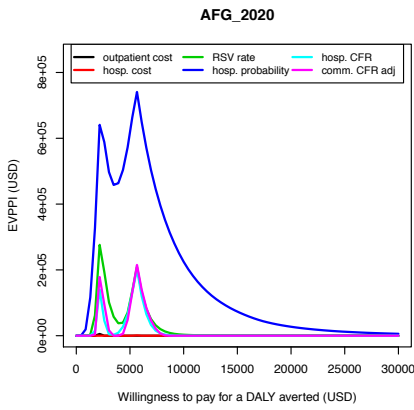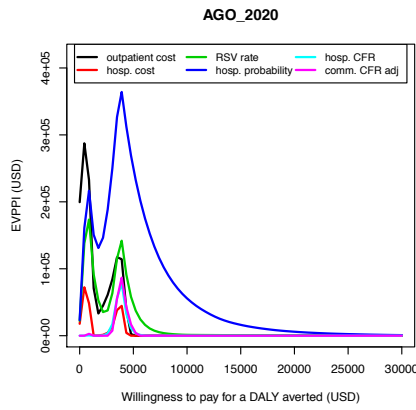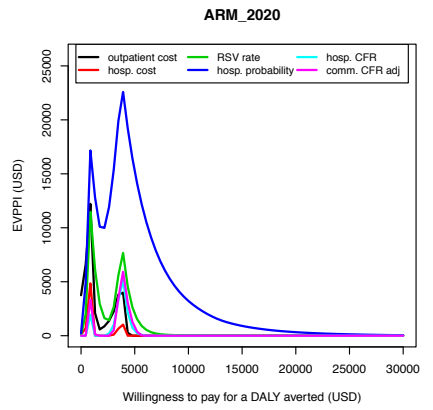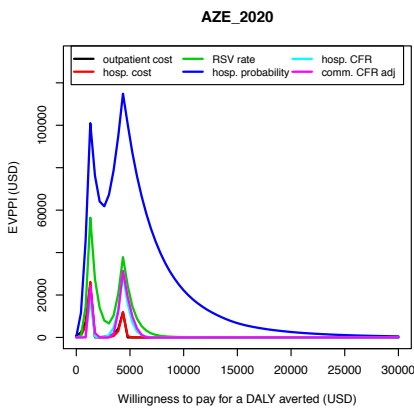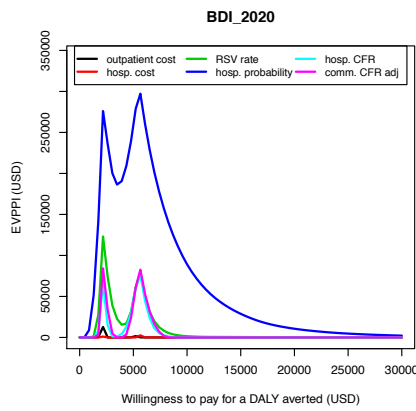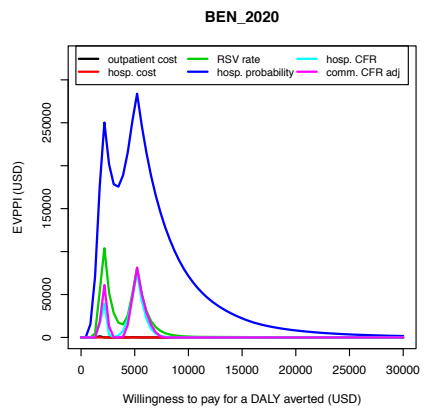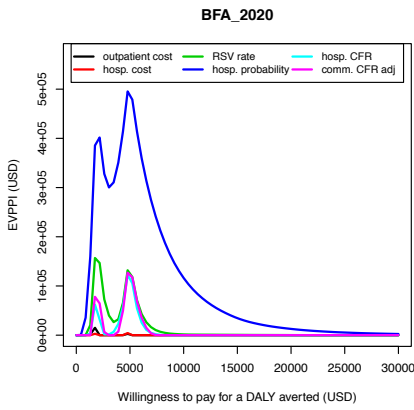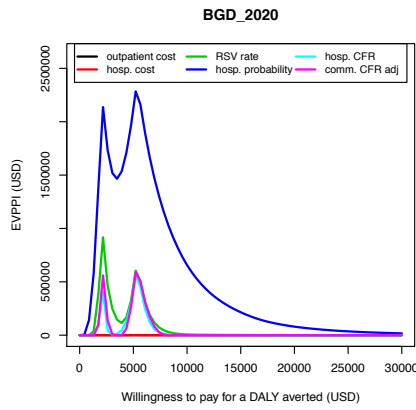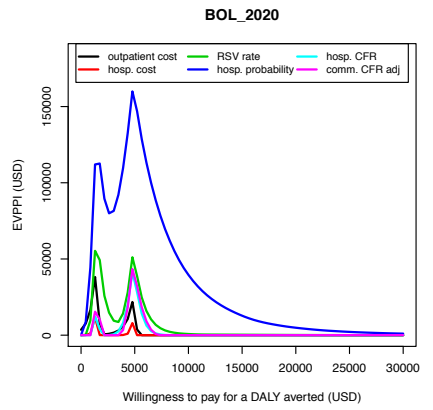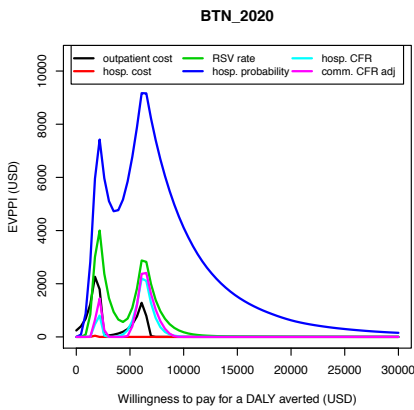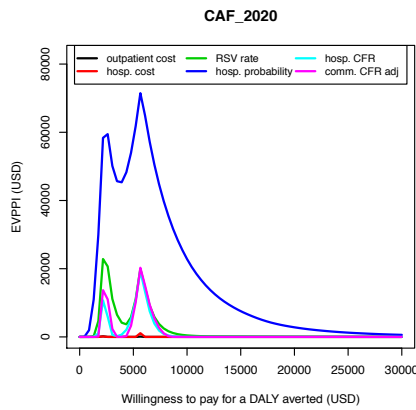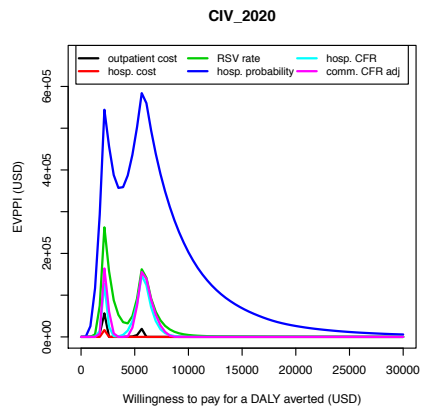

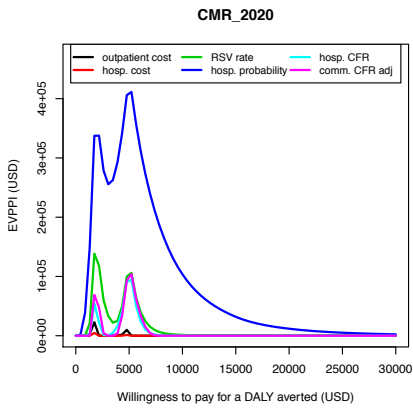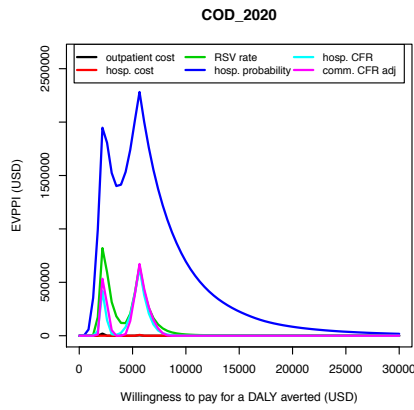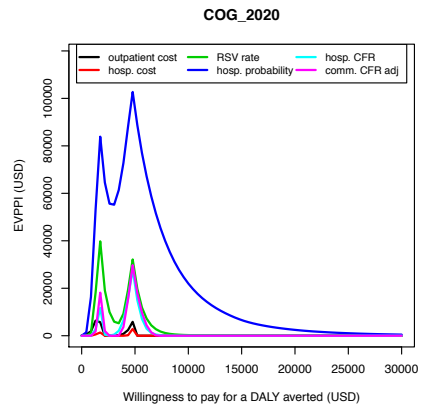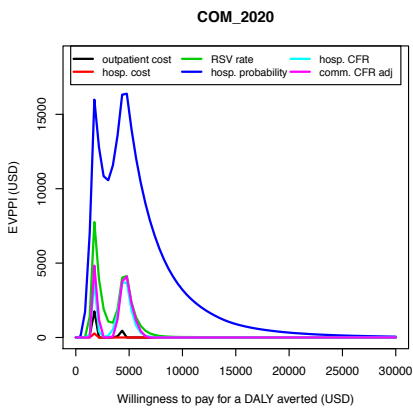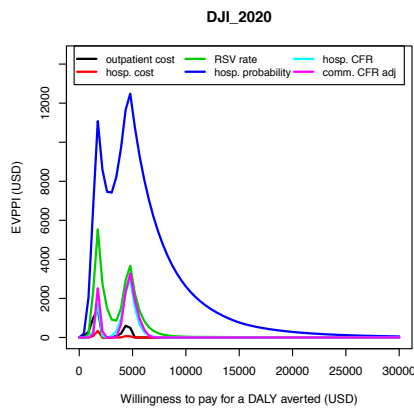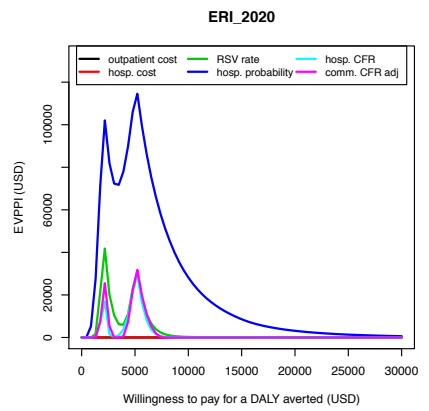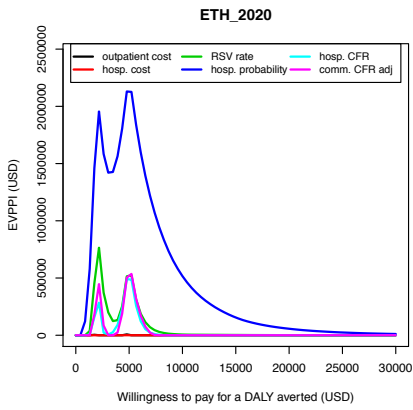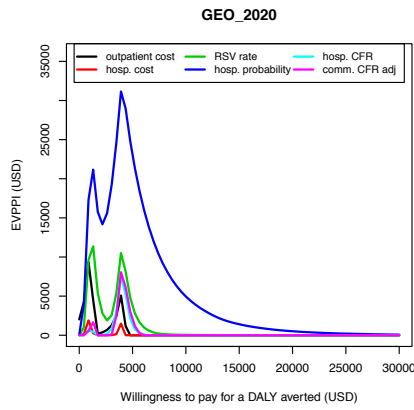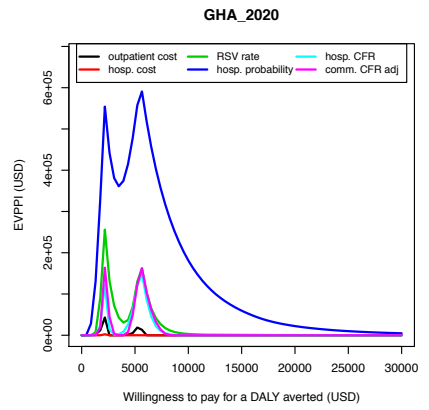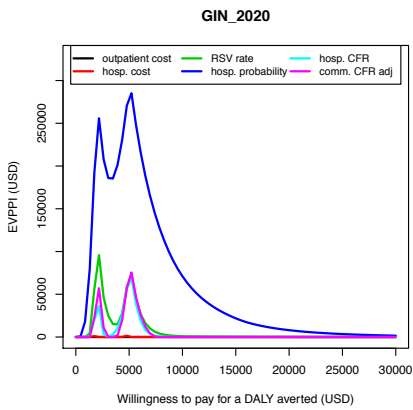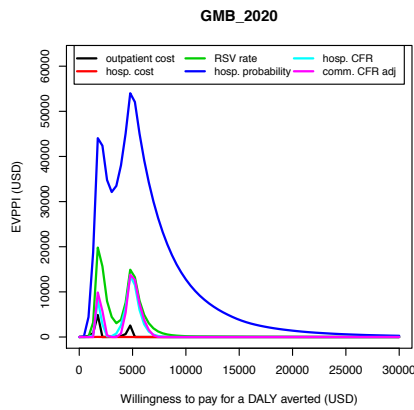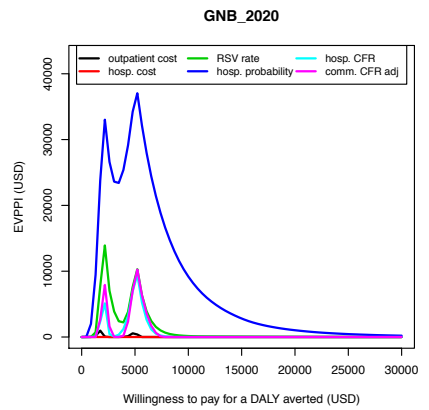

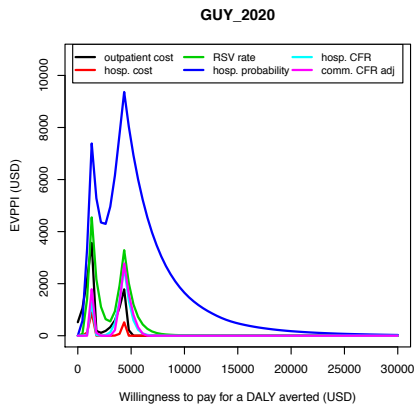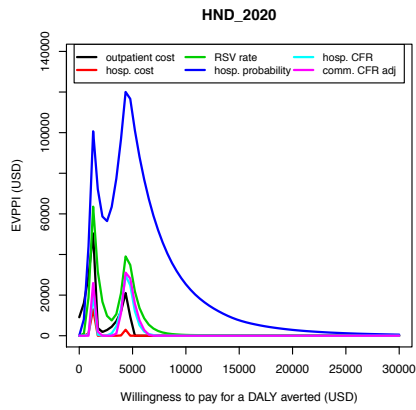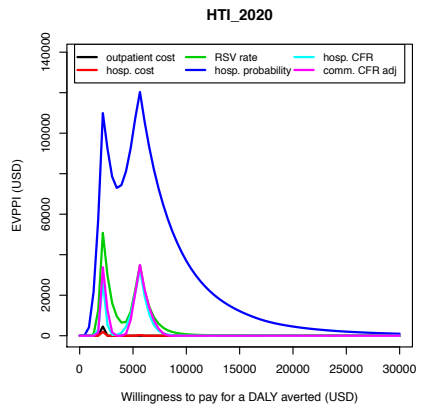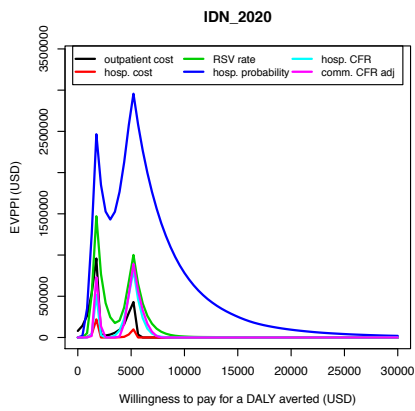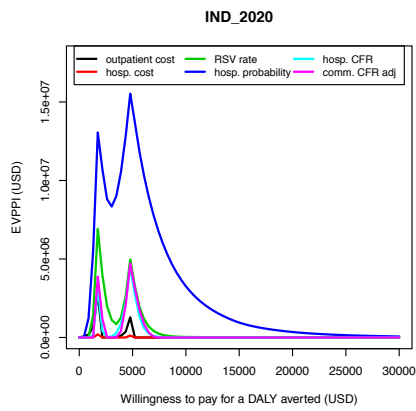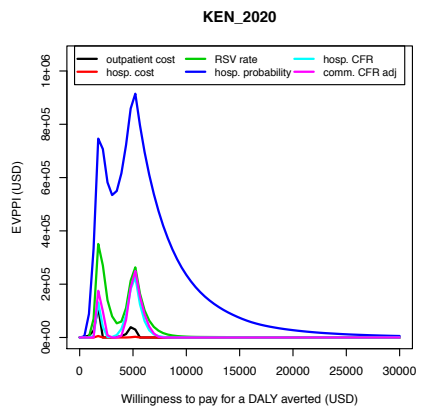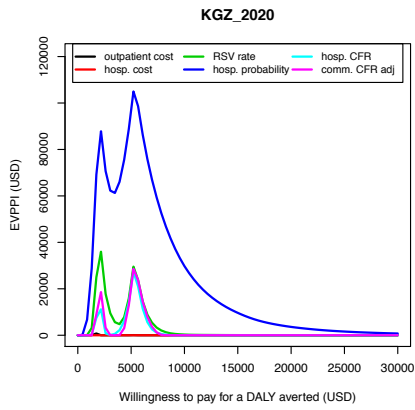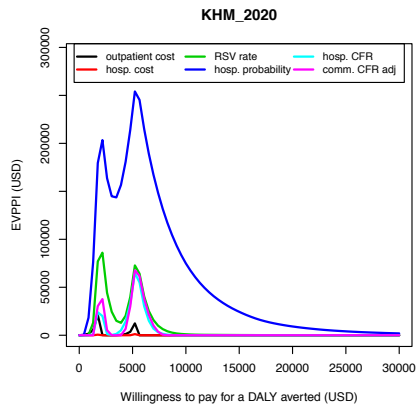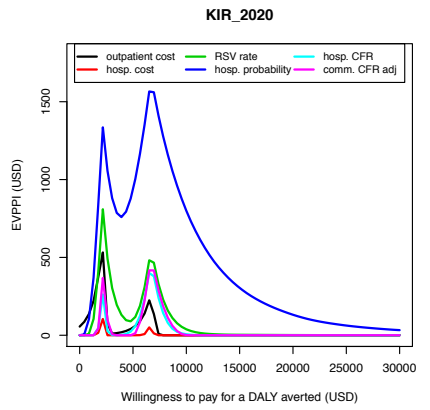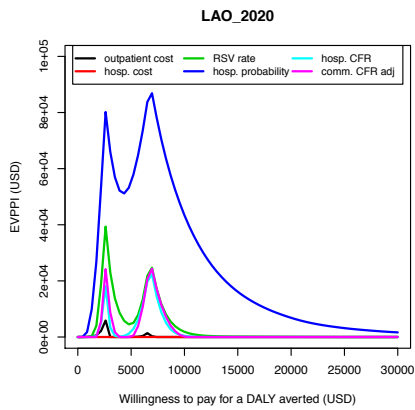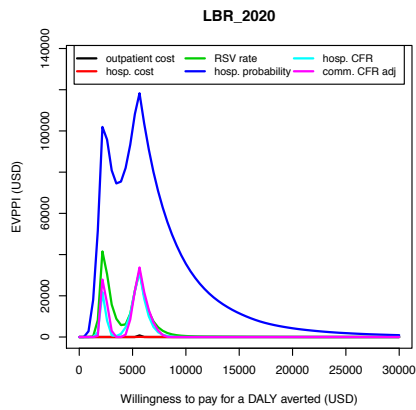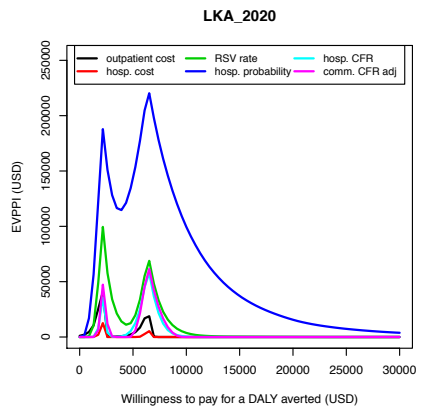

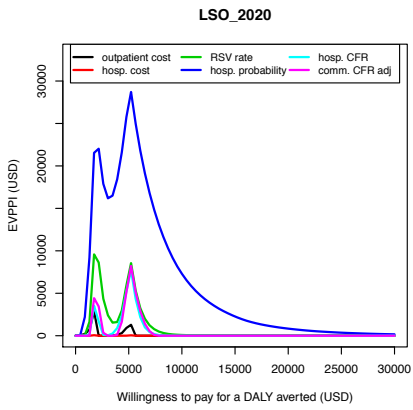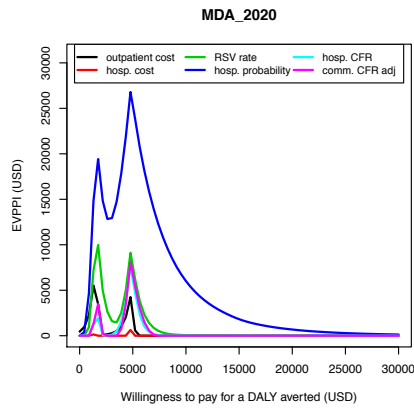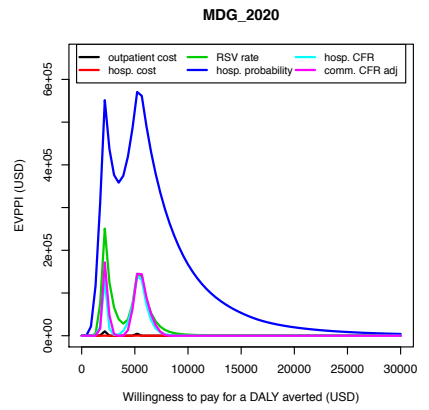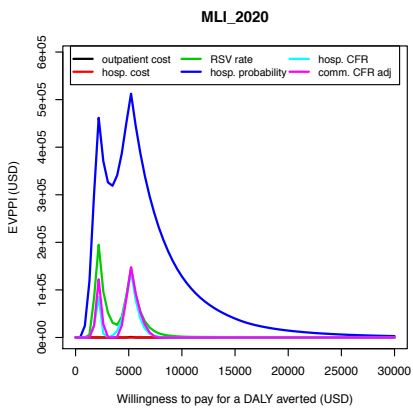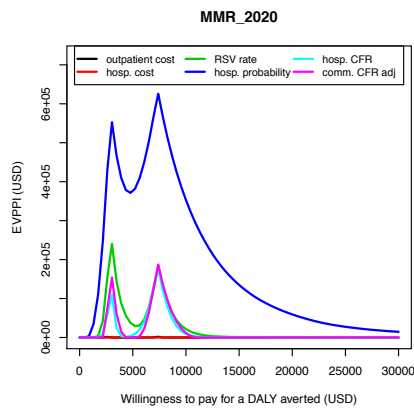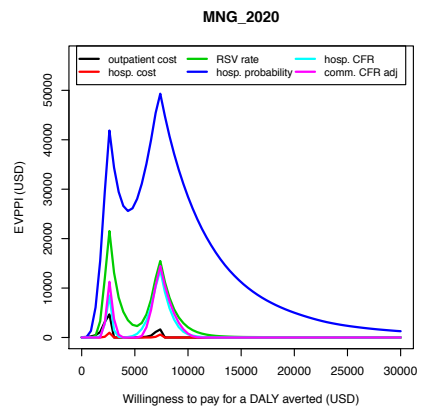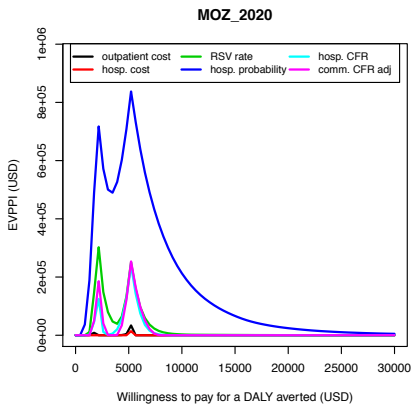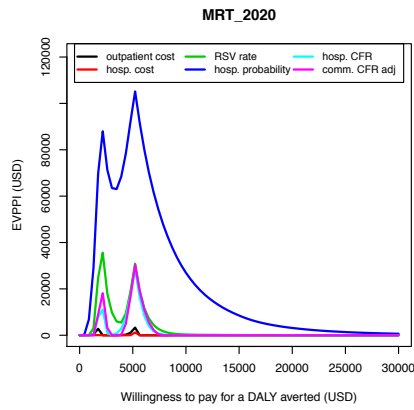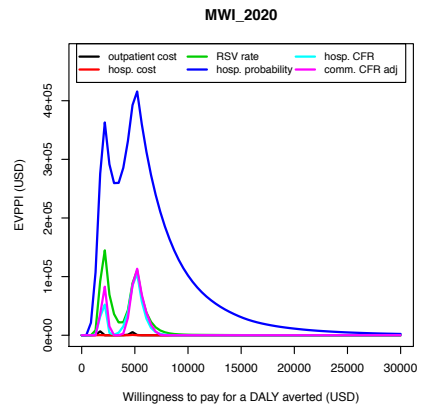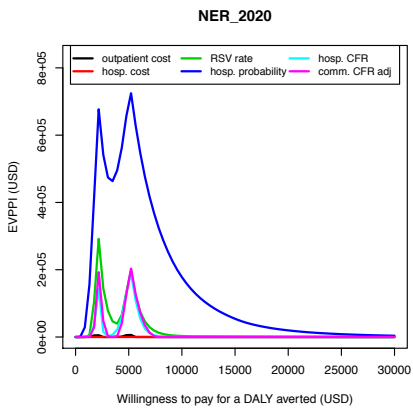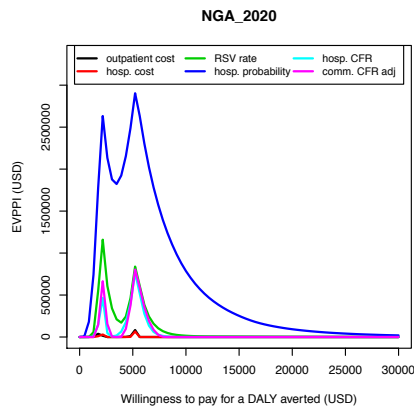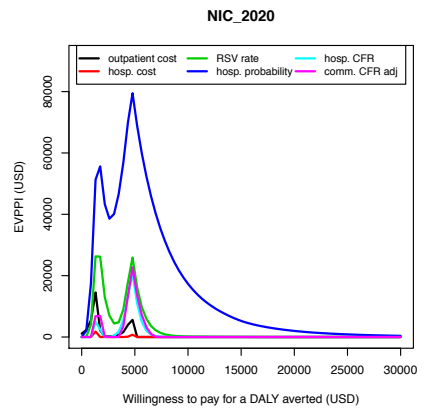

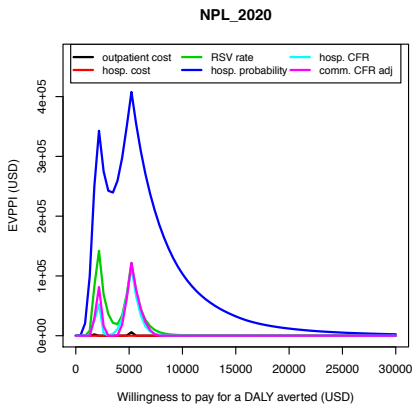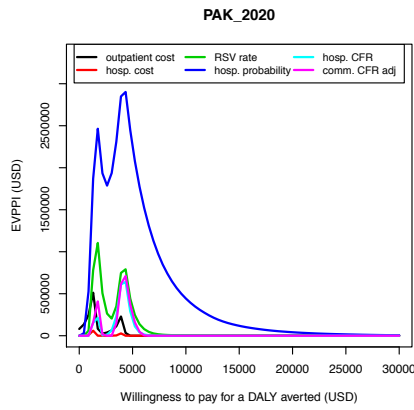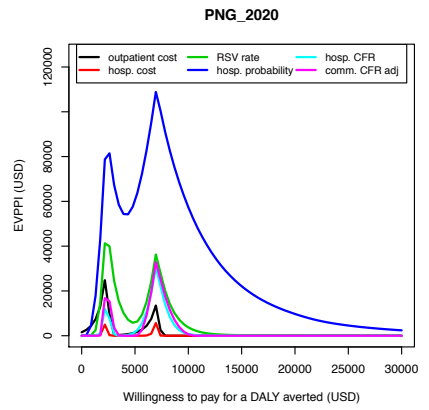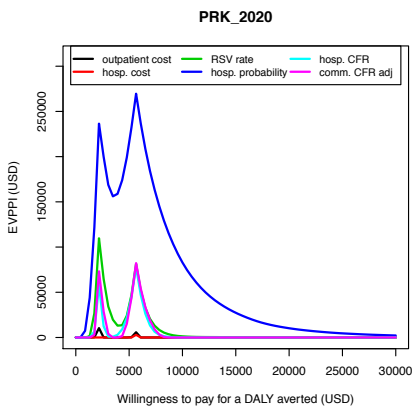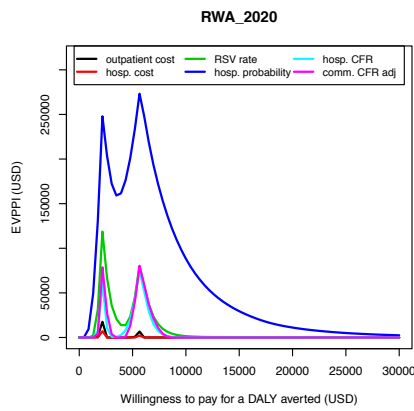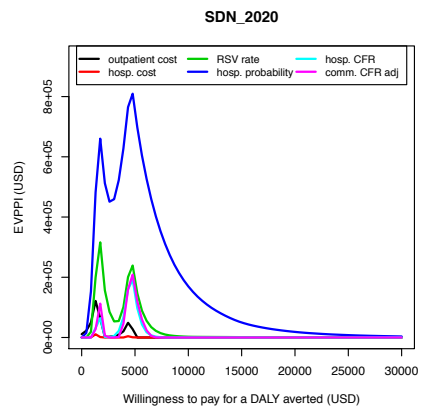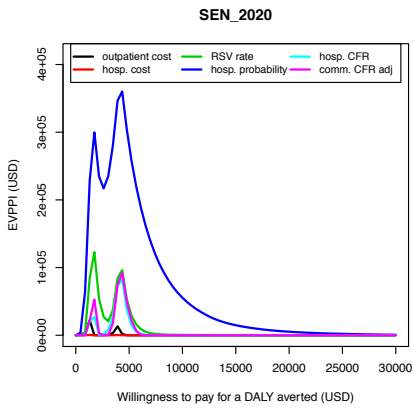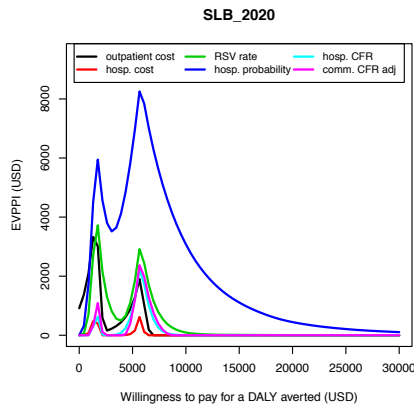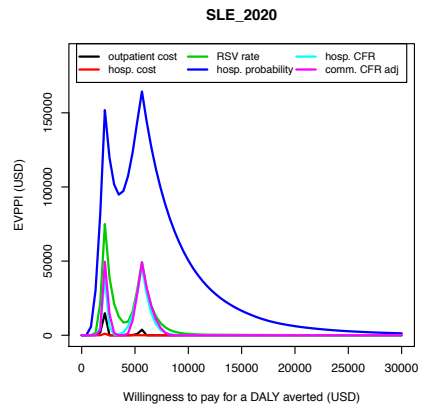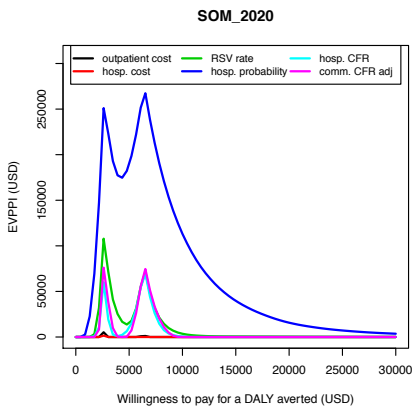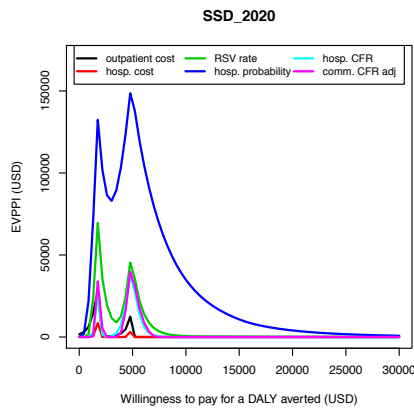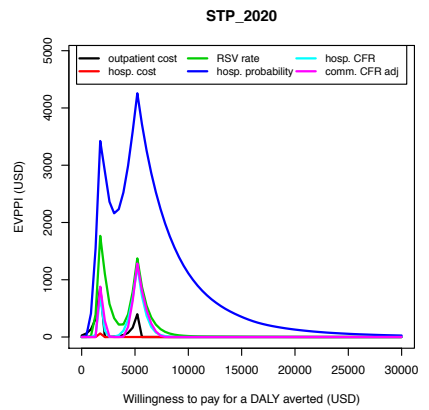



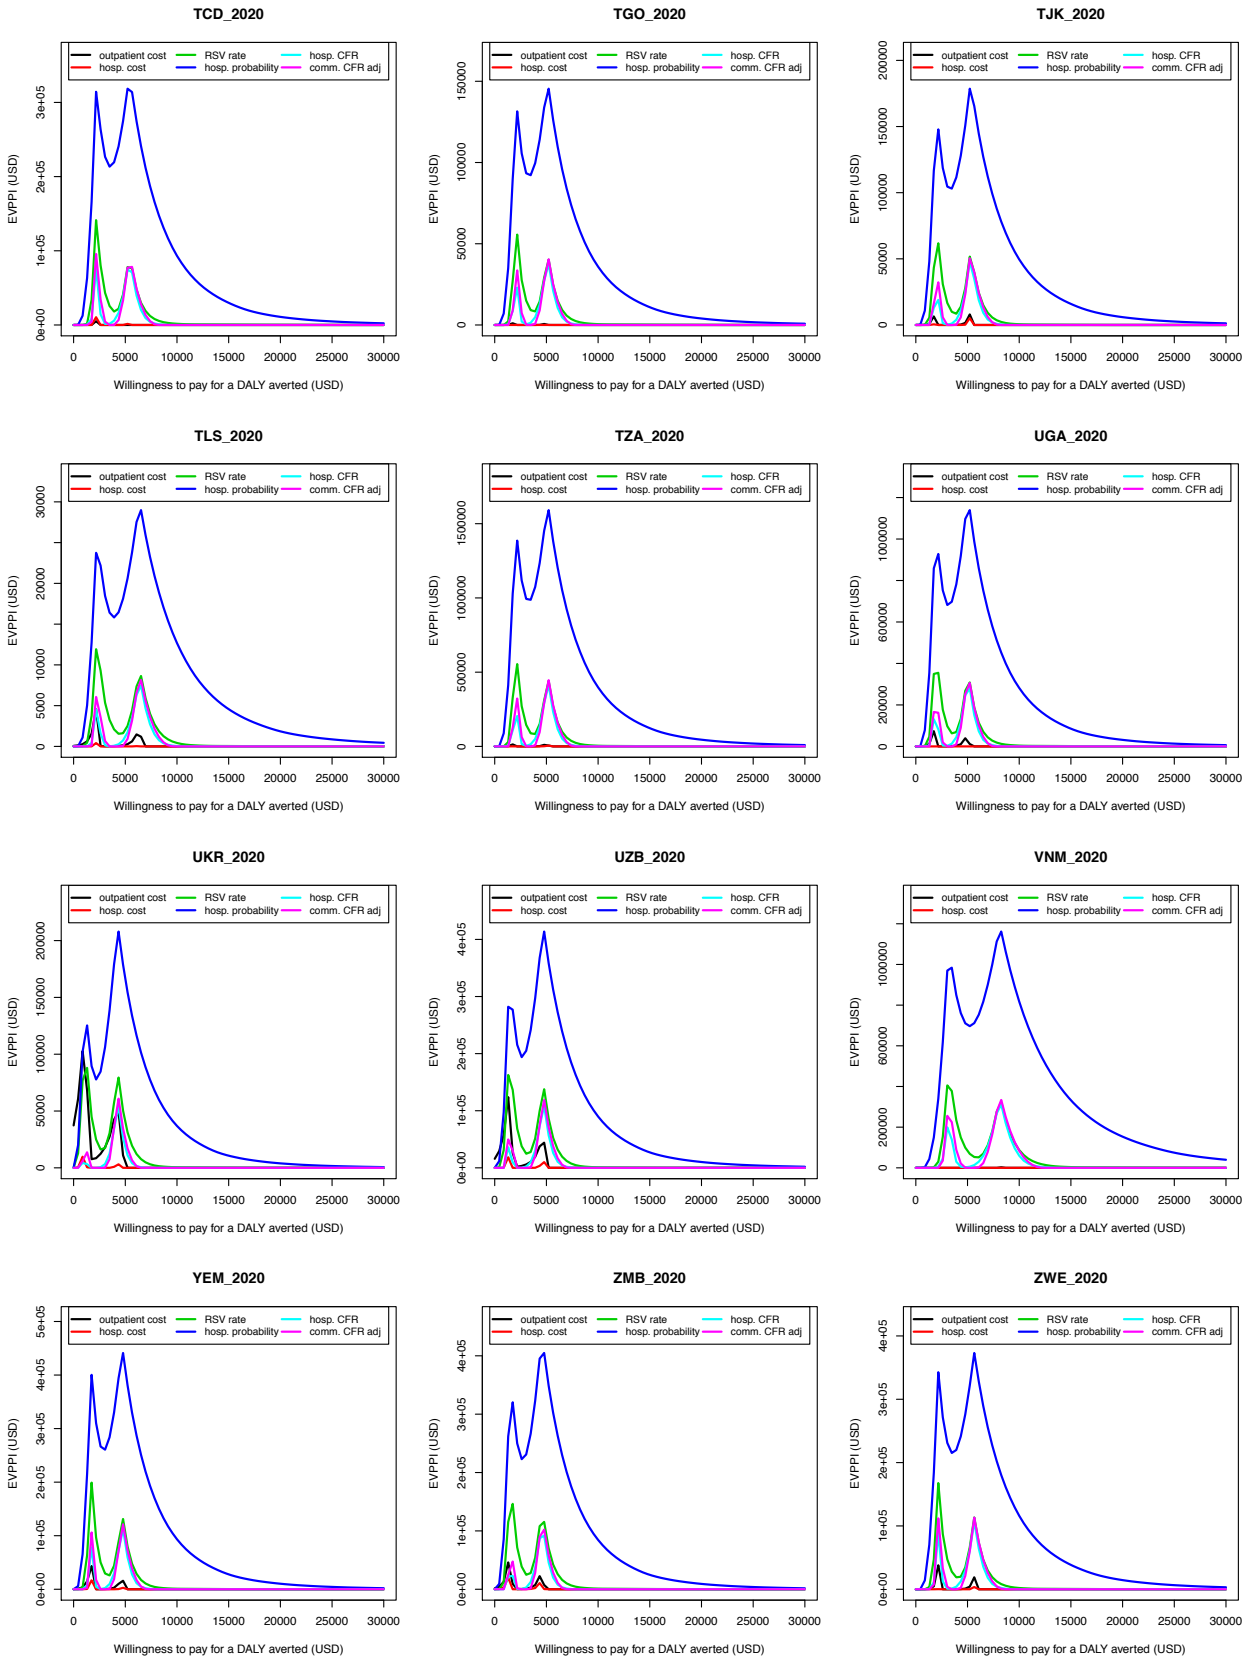

129

130 *S. Figure 7: Expected Value of Partially Perfect Information (EVPPi) of all 72 countries*

131 *The Y-axis is adjusted per country*

132 **2.3 Scenario analysis: using pooled hospital probability**

133 This scenario applied the pooled data (combining Nokes et al, 2008 and Homaira et al, 2012) on  
 134 hospital probability to construct our hospital probability estimates instead of using only the hospital  
 135 probability data from Nokes et al. S. Table 1 demonstrates that both maternal and the mAb strategies  
 136 would prevent fewer RSV-associated hospital admissions and deaths than using the estimates of  
 137 using only the data of Nokes et al, with increased uncertainty range. This is caused by the lower  
 138 expected mean of the hospital probability and the wider uncertainty range when using the pooled  
 139 analysis. Consequently, this analysis shows that the interventions would avert fewer discounted  
 140 DALYs and hospital admission costs.

141 *S. Table 1: Estimated mean costs and health outcomes averted by RSV interventions using pooled hospital probability data*

| RSV associated ('000)                    | No intervention            |                             | mAb (6m protection)         |              | Maternal (5m protection)    |              |
|------------------------------------------|----------------------------|-----------------------------|-----------------------------|--------------|-----------------------------|--------------|
|                                          | Under 1 year               | 1-4 years                   | Under 1 year                | Under 1 year | Under 1 year                | Under 1 year |
| RSV cases (Non-hospital +hospital cases) | 7,649 [5,366 - 10,138]     | 13,192 [10,691 - 15,486]    | 5,928 [4,363 - 7,504]       |              | 6,464 [4,712 - 8,231]       |              |
| Hospital admissions                      | 280 [1 - 2,332]            | 478 [2 - 3,989]             | 216 [1 - 1,793]             |              | 236 [1 - 1,954]             |              |
| Deaths                                   | 8 [0 - 60]                 | 9 [0 - 72]                  | 6 [0 - 45]                  |              | 6 [0 - 49]                  |              |
| Discounted YLDs                          | 14 [9 - 24]                | 22 [17 - 39]                | 11 [7 - 18]                 |              | 12 [8 - 20]                 |              |
| Discounted YLLs                          | 215 [1 - 1,713]            | 245 [1 - 1,957]             | 159 [1 - 1,272]             |              | 175 [1 - 1,402]             |              |
| Discounted DALYs                         | 228 [12 - 1,736]           | 268 [21 - 1,994]            | 170 [10 - 1,288]            |              | 186 [11 - 1,419]            |              |
| Intervention costs (including delivery)  | 0                          | 0 [0 - 0]                   | 430,531 [430,531 - 430,531] |              | 220,775 [220,775 - 220,775] |              |
| Discounted outpatient costs              | 165,759 [70,722 - 363,149] | 285,859 [132,690 - 608,725] | 128,944 [56,369 - 281,702]  |              | 140,402 [61,045 - 306,739]  |              |
| Discounted hospital costs                | 31,408 [146 - 253,072]     | 50,765 [235 - 423,703]      | 24,571 [116 - 198,123]      |              | 26,691 [125 - 216,044]      |              |
| Discounted total costs                   | 197,166 [83,013 - 459,127] | 321,091 [148,008 - 714,158] | 584,046 [496,832 - 780,774] |              | 387,868 [292,512 - 603,763] |              |
| <b>Burden averted</b>                    |                            |                             |                             |              |                             |              |
| RSV cases averted                        | NA                         | NA                          | 1,721 [979 - 2,660]         |              | 1,186 [640 - 1,924]         |              |
| Hospital admission averted               | NA                         | NA                          | 63 [0 - 529]                |              | 44 [0 - 364]                |              |
| Death averted                            | NA                         | NA                          | 2 [0 - 16]                  |              | 1 [0 - 11]                  |              |
| Discounted DALY averted                  | NA                         | NA                          | 59 [3 - 450]                |              | 42 [2 - 325]                |              |
| Net discounted costs                     | NA                         | NA                          | 386,880 [324,186 - 414,244] |              | 190,702 [145,263 - 210,059] |              |

142 *Estimated mean [95% credible interval] costs and health outcomes averted by RSV interventions summed over 72 Gavi countries in 2020*  
 143 *using pooled hospital probability data, and keeping all other parameters as in the base scenario in the main text using 70% efficacy for both*  
 144 *strategies, 1 extra month of protection at 3USD more for mAb vs maternal. Costs are presented in USD2016. Outputs are discounted at a*  
 145 *rate of 3% per year.*

147 Compared with using only the Nokes et al hospital probability (base case), the maternal strategy has  
 148 a markedly lower probability to become the optimal (most cost-effective) strategy, whereas the mAb  
 149 strategy becomes optimal at a much higher WTP level. (S. Figure 8)

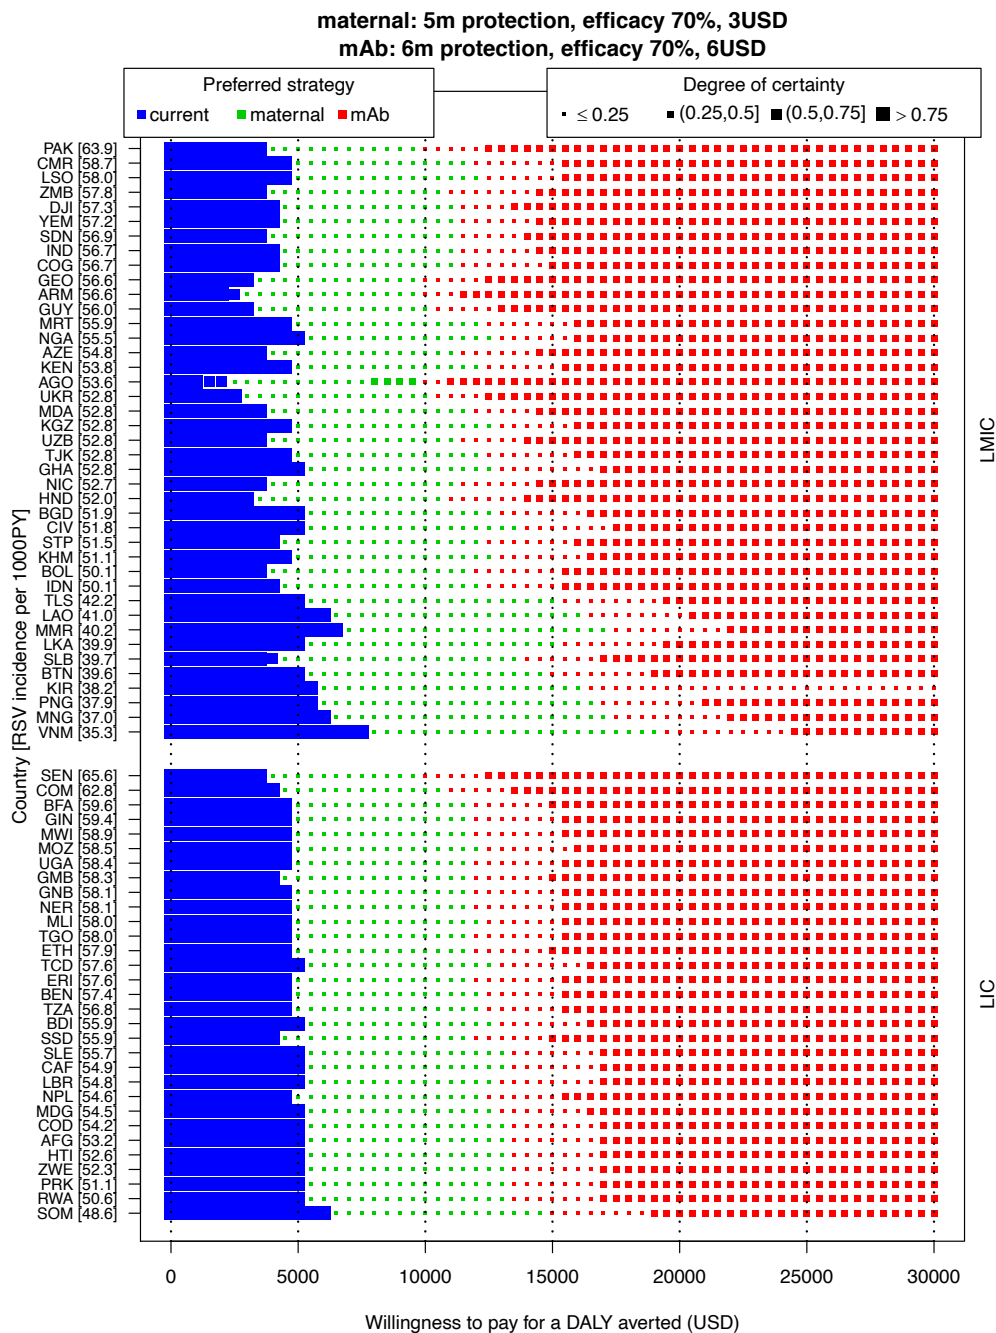

150

151 *S. Figure 8: Cost-effectiveness analysis when using pooled hospital probability data*

152 *Cost-effectiveness analysis when using pooled hospital probability data to construct our estimates of hospital probability. The optimal*  
 153 *strategy is shown by the colours (the current strategy is no intervention) and our certainty is indicated by the sizes of the markers. These*  
 154 *results come from constructing a cost-effectiveness acceptability curve and a cost-effectiveness acceptability frontier for each country for a*  
 155 *range of WTP values (0-30,000 USD per DALY averted). Countries are ranked by RSV incidence rate (high to low in left Y-axis [per 1000*  
 156 *person-year]) and stratified by income group (LIC or LMIC, on the right Y-axis).*

157 **2.4 Scenario analysis: without discounting**

158 Costs and effects (DALYs) are discounted at 3% in our base case analysis. When they are not  
 159 discounted, both the maternal and mAb strategies would avert more DALYs, however, they would not  
 160 prevent more outpatient and hospital admission costs because these costs occur in the first year of  
 161 life, and are not subject to discounting under our approach (S. Table 2). S. Figure 9 shows that the  
 162 WTP values at which “switches” occur between no intervention and the maternal strategy, as well as  
 163 from the maternal to the mAb strategy appear to be lower compared with the base case. The mAb  
 164 strategy becomes the most cost-effective strategy at a WTP value of 4,000 USD. For the sake of  
 165 space, we chose not to show scenarios using higher than 3% discount rates, although it should be  
 166 clear that this would make the results less attractive for both the maternal and mAb strategies in  
 167 comparison to the base scenario shown in the main text.

168 *S. Table 2: Estimated mean costs and health outcomes averted by RSV interventions using 0% discounting rate*

| RSV associated ('000)                    | No intervention             |                             | mAb (6m protection)         |              | Maternal (5m protection)    |              |
|------------------------------------------|-----------------------------|-----------------------------|-----------------------------|--------------|-----------------------------|--------------|
|                                          | Under 1 year                | 1-4 years                   | Under 1 year                | Under 1 year | Under 1 year                | Under 1 year |
| RSV cases (Non-hospital +hospital cases) | 7,649 [5,366 - 10,138]      | 13,192 [10,691 - 15,486]    | 5,928 [4,363 - 7,503]       |              | 6,464 [4,712 - 8,231]       |              |
| Hospital admissions                      | 668 [142 - 1,853]           | 1,150 [258 - 3,139]         | 517 [112 - 1,421]           |              | 564 [122 - 1,555]           |              |
| Deaths                                   | 18 [3 - 55]                 | 22 [4 - 68]                 | 13 [2 - 40]                 |              | 15 [3 - 44]                 |              |
| YLDs                                     | 16 [10 - 24]                | 27 [20 - 38]                | 12 [8 - 18]                 |              | 13 [9 - 19]                 |              |
| YLLs                                     | 1,195 [206 - 3,611]         | 1,443 [250 - 4,454]         | 886 [157 - 2,634]           |              | 973 [172 - 2,906]           |              |
| DALYs                                    | 1,210 [219 - 3,630]         | 1,470 [272 - 4,497]         | 898 [167 - 2,650]           |              | 986 [183 - 2,922]           |              |
| Intervention costs (including delivery)  | 0                           | 0 [0 - 0]                   | 430,531 [430,531 - 430,531] |              | 220,775 [220,775 - 220,775] |              |
| Outpatient costs                         | 157,114 [69,436 - 341,707]  | 270,910 [128,069 - 577,098] | 122,214 [55,209 - 264,714]  |              | 133,078 [59,878 - 288,301]  |              |
| Hospital costs                           | 75,254 [15,043 - 213,053]   | 129,391 [26,980 - 362,593]  | 58,975 [12,080 - 166,009]   |              | 64,033 [13,123 - 179,855]   |              |
| Total costs                              | 232,368 [112,538 - 443,860] | 400,300 [205,404 - 736,753] | 611,720 [521,121 - 770,475] |              | 417,885 [319,308 - 592,027] |              |
| <b>Burden averted</b>                    |                             |                             |                             |              |                             |              |
| RSV cases averted                        | NA                          | NA                          | 1,721 [979 - 2,659]         |              | 1,186 [641 - 1,924]         |              |
| Hospital admission averted               | NA                          | NA                          | 151 [29 - 443]              |              | 104 [19 - 309]              |              |
| Death averted                            | NA                          | NA                          | 5 [1 - 15]                  |              | 3 [1 - 11]                  |              |
| DALY averted                             | NA                          | NA                          | 312 [51 - 973]              |              | 224 [35 - 708]              |              |
| Net costs                                | NA                          | NA                          | 379,352 [322,875 - 408,824] |              | 185,517 [144,452 - 206,446] |              |

169 *Estimated mean [95% credible interval] costs and health outcomes averted by RSV interventions summed over 72 Gavi countries using*  
 170 *0% discounting rate (in 2020). Constant parameters are: Nokes' hospital probability data, efficacy (70% for both strategies) and duration of*  
 171 *protection (maternal: 5 months vs. mAb: 6 months) and cost of interventions (maternal:3 USD vs. mAb: 6 USD per dose). Costs are*  
 172 *presented in USD2016.*

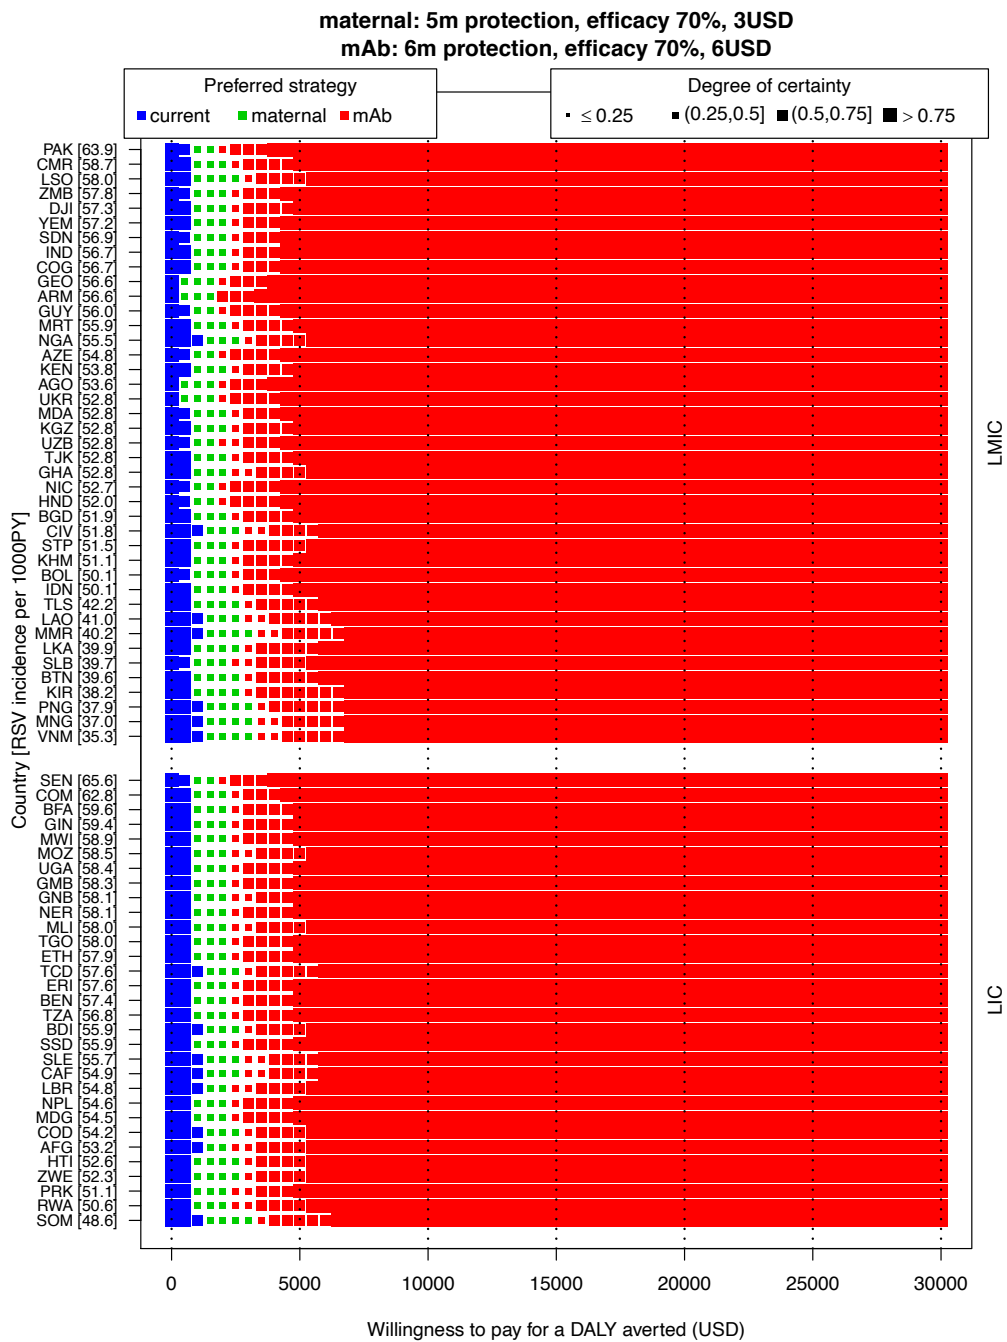

173

174 *S. Figure 9: Cost-effectiveness analysis when assuming a 0% discount rate.*

175 *Cost-effectiveness analysis when assuming a 0% discount rate. The optimal strategy is shown by the colours (current strategy is no*  
 176 *intervention) and our certainty is indicated by the sizes of the markers. These results come from constructing a cost-effectiveness*  
 177 *acceptability curve and a cost-effectiveness acceptability frontier for each country for a range of WTP values (0-30,000 USD per DALY*  
 178 *averted). Countries are ranked by RSV incidence rate (high to low in left Y-axis [per 1000 person-year]) and stratified by income group (LIC*  
 179 *or LMIC, on the right Y-axis).*

180 **2.5 Scenario analysis: trial-based vaccine efficacy**

181 Our analyses in the main text applied the same efficacy against symptomatic RSV-associated cases  
 182 and hospitalisation. Recently, topline results of the first RSV maternal immunisation phase 3 trial  
 183 (PrepareTM) have been made public; the trial vaccinated 4,636 pregnant women [9]. The efficacy of  
 184 the maternal vaccine against primary and secondary endpoints are reported in S. Table 3.

185 *S. Table 3: Reported vaccine efficacy in phase 3 PrepareTM trial*

| Endpoints                                  | Per-protocol: RSV LRTI in infants through 90 days of life                                           | Pre-specified exploratory analyses                                                                |
|--------------------------------------------|-----------------------------------------------------------------------------------------------------|---------------------------------------------------------------------------------------------------|
| Medically significant RSV LRTI (primary)   | 39% (97.5%CI, -1% to 64%)<br>Incidence in placebo arm: 35/1430<br>Incidence in product arm: 41/2765 | 41% (95%CI, 16% to 58%)<br>Incidence in placebo arm: 56/1430<br>Incidence in product arm: 64/2765 |
| RSV LRTI hospitalisations (secondary)      | 44% (95%CI, 20% to 62%)<br>Incidence in placebo arm: 53/1430<br>Incidence in product arm: 57/2765   | 42% (95%CI, 17% to 59%)<br>Incidence in placebo arm: 55/1430<br>Incidence in product arm: 62/2765 |
| RSV LRTI with severe hypoxemia (secondary) | 48% (95%CI, -8% to 75%)<br>Incidence in placebo arm: 14/1430<br>Incidence in product arm: 14/2765   | 60% (95%CI, 32% to 76%)<br>Incidence in placebo arm: 32/1430<br>Incidence in product arm: 25/2765 |

186

187 We used vaccine efficacy estimates as a proxy for effectiveness. To account for the uncertainty  
 188 around the average efficacy in our model, we used a lognormal distribution for relative risk, with its  
 189 mean and standard error as expressed below:

190 
$$mean [ \ln (Relative Risk) ] = \ln(a) - \ln(a + c) + \ln(b + d) - \ln(b)$$

191 
$$standard\ error [ \ln(Relative\ Risk) ] = \sqrt{(a^{-1} - (a + c)^{-1} + b^{-1} + (b + d)^{-1})}$$
,

192 with ‘a’ and ‘a+c’ the number of cases and individuals in the placebo arm, respectively and ‘b’ and  
 193 ‘b+d’ the number of cases and individuals in the product arm, respectively. Efficacy estimates were  
 194 then obtained as one minus the relative risk. As such, we were able to capture the asymmetry of the  
 195 reported confidence intervals. A very small proportion of samples resulted in negative efficacy  
 196 estimates (about 0.2%), we replaced these by zero, which had no effect on the mean efficacy  
 197 estimates and 95% confidence intervals up to two decimals. We sampled jointly from the uncertainty  
 198 distributions of efficacy against the primary and secondary endpoint to account for their correlation  
 199 (i.e. the efficacy estimates are based on the same dataset).

200 In absence of full analytical results of the trial, three scenarios were evaluated based on the reported  
 201 maternal vaccine efficacy values, while maintaining the efficacy assumption of mAb at 70%. All details  
 202 are provided in S. Table 4.

203 *S. Table 4: Vaccine efficacy estimates for the trial-based scenarios*

| Scenario                                   | Parameter                              | Vaccine efficacy against RSV-associated cases                            | Vaccine efficacy against RSV-associated hospitalisations and deaths      |
|--------------------------------------------|----------------------------------------|--------------------------------------------------------------------------|--------------------------------------------------------------------------|
| A. Overall Efficacy                        | Reported efficacy & source             | 41% (95%CI, 16% to 58%)<br>(Medically significant, exploratory analyses) | 41% (95%CI, 16% to 58%)<br>(Medically significant, exploratory analyses) |
|                                            | Model uncertainty distribution         | lognormal<br>(mean=-0.5258, std.dev= 0.1839)                             | lognormal<br>(mean=-0.5258, std.dev= 0.1839)                             |
|                                            | Model mean and 95% confidence interval | 40% (95% CI 15% to 59%)                                                  | 40% (95% CI 15% to 59%)                                                  |
| B. Most in favour of the maternal vaccine  | Reported efficacy & source             | 41% (95%CI, 16% to 58%)<br>(Medically significant, exploratory analyses) | 60% (95%CI, 32% to 76%)<br>(Severe hypoxemia, exploratory analysis)      |
|                                            | Model distribution                     | lognormal<br>(mean=-0.5258, std.dev= 0.1839)                             | lognormal<br>(mean=-0.9062, std.dev=0.2676)                              |
|                                            | Model estimates                        | 40% (95% CI 15% to 59%)                                                  | 58% (95% CI, 31% to 76%)                                                 |
| C. Least in favour of the maternal vaccine | Reported efficacy & source             | 39% (97.5%CI, -1% to 64%)<br>(Medically significant, per-protocol)       | 42% (95%CI, 17% to 59%)<br>(Hospitalisation, exploratory analysis)       |
|                                            | Model distribution                     | lognormal<br>(mean=-0.5011, std.dev=0.2309)                              | lognormal<br>(mean=-0.5396, std.dev=0.1861)                              |
|                                            | Model estimates                        | 38% (95% CI 4% to 61%)<br>(97.5%CI 0% to 64%)                            | 40% (95% CI 16% to 59%)                                                  |

204

205 The results of the trial-based vaccine efficacy scenarios are summarized in S. Table 5. In general, the  
 206 results of the 3 scenarios are quite similar. The maternal strategy averted more cases and  
 207 hospitalisations when we used efficacy estimates most in favour of the vaccine.

208 Results per country are presented in S. Figure 10, in comparison with the base case (70% vaccine  
 209 efficacy). Scenario A shows that when the maternal vaccine efficacy is at 40% (95%CI, 15% to 59%),  
 210 the maternal strategy never becomes the most cost-effective strategy at any WTP level. In scenario  
 211 B (most in favour of the vaccine), the maternal strategy becomes the most cost-effective strategy at  
 212 WTP values of 1,800-3,800 USD per DALY averted, which is in line with the base case analysis (800-  
 213 3,000 USD per DALY averted). For scenario C (least in favour of the vaccine), the marginal protection  
 214 against RSV-associated hospitalisation (38% vs. 40%) is not enough to switch strategies.

215 In conclusion, when maternal vaccine offers sufficiently higher protection against hospitalisation (e.g.  
 216 58%), it would compensate its lower efficacy against the RSV-associated cases (e.g. 40%). However,

217 the mAb strategy becomes the optimal strategy at lower WTP values (2,000-6,000 vs. 4,000-8,000  
 218 USD per DALY averted) than in the base case.

219 *S. Table 5: Estimated mean costs and health outcomes (in thousand) in children under 1 using trial-based-efficacy values*

| RSV associated ('000)                    | No intervention                | Senario A<br>Maternal (5m protection)<br>overall efficacy at 40% | Senario B<br>Maternal (5m protection)<br>Most in favour of the vaccine | Senario C<br>Maternal (5m protection)<br>Least in favour of the vaccine |
|------------------------------------------|--------------------------------|------------------------------------------------------------------|------------------------------------------------------------------------|-------------------------------------------------------------------------|
|                                          | Under 1 year                   | Under 1 year                                                     | Under 1 year                                                           | Under 1 year                                                            |
| RSV cases (Non-hospital +hospital cases) | 7,649 [5,366 - 10,138]         | 6,979 [4,998 - 9,114]                                            | 6,977 [4,994 - 9,114]                                                  | 7,012 [5,018 - 9,220]                                                   |
| Hospital admissions                      | 668 [142 - 1,853]              | 609 [130 - 1,685]                                                | 582 [125 - 1,612]                                                      | 608 [130 - 1,682]                                                       |
| Deaths                                   | 18 [3 - 55]                    | 16 [3 - 49]                                                      | 15 [3 - 46]                                                            | 16 [3 - 48]                                                             |
| Discounted YLDs                          | 16 [10 - 24]                   | 14 [9 - 21]                                                      | 14 [9 - 21]                                                            | 14 [9 - 21]                                                             |
| Discounted YLLs                          | 517 [89 - 1,561]               | 462 [80 - 1,386]                                                 | 437 [76 - 1,312]                                                       | 461 [79 - 1,383]                                                        |
| Discounted DALYs                         | 532 [102 - 1,581]              | 477 [91 - 1,404]                                                 | 451 [87 - 1,330]                                                       | 476 [91 - 1,400]                                                        |
| Intervention costs (including delivery)  | NA                             | 220,775 [220,775 - 220,775]                                      | 220,775 [220,775 - 220,775]                                            | 220,775 [220,775 - 220,775]                                             |
| Discounted outpatient costs              | 157,114<br>[69,436 - 341,707]  | 143,509 [63,740 - 312,907]                                       | 144,073 [64,161 - 314,132]                                             | 144,285 [63,872 - 312,614]                                              |
| Discounted hospital costs                | 75,254<br>[15,043 - 213,053]   | 68,905 [13,919 - 196,544]                                        | 65,972 [13,375 - 188,187]                                              | 68,766 [13,879 - 196,195]                                               |
| Discounted total costs                   | 232,368<br>[112,538 - 443,860] | 433,189<br>[324,845 - 623,143]                                   | 430,776<br>[323,610 - 617,882]                                         | 433,781<br>[324,875 - 624,539]                                          |
| <b>Burden averted</b>                    |                                |                                                                  |                                                                        |                                                                         |
| RSV cases averted                        | NA                             | 671 [216 - 1,267]                                                | 671 [215 - 1,267]                                                      | 635 [64 - 1,293]                                                        |
| Hospital admissions averted              | NA                             | 59 [8 - 180]                                                     | 86 [14 - 257]                                                          | 60 [9 - 183]                                                            |
| Deaths averted                           | NA                             | 2 [0 - 7]                                                        | 3 [0 - 9]                                                              | 2 [0 - 7]                                                               |
| Discounted DALYs averted                 | NA                             | 56 [7 - 191]                                                     | 81 [12 - 269]                                                          | 57 [7 - 194]                                                            |
| Net discounted costs                     | NA                             | 200,821<br>[172,847 - 215,562]                                   | 198,459<br>[167,588 - 214,585]                                         | 201,464<br>[172,132 - 218,016]                                          |

220 *Estimated mean [95% credible interval] costs and health outcomes (in thousand) pre- and post-RSV interventions in children under 1 year,*  
 221 *summed over 72 Gavi countries (in 2020) using trial-based efficacy values. Constant parameters are: Nokes' hospital probability data,*  
 222 *duration of protection (maternal: 5 months and mAb: 6 months) and cost of interventions (maternal:3 USD and mAb: 6 USD per dose).*  
 223 *Costs are presented in USD2016. Outputs are discounted at a rate of 3% per year*



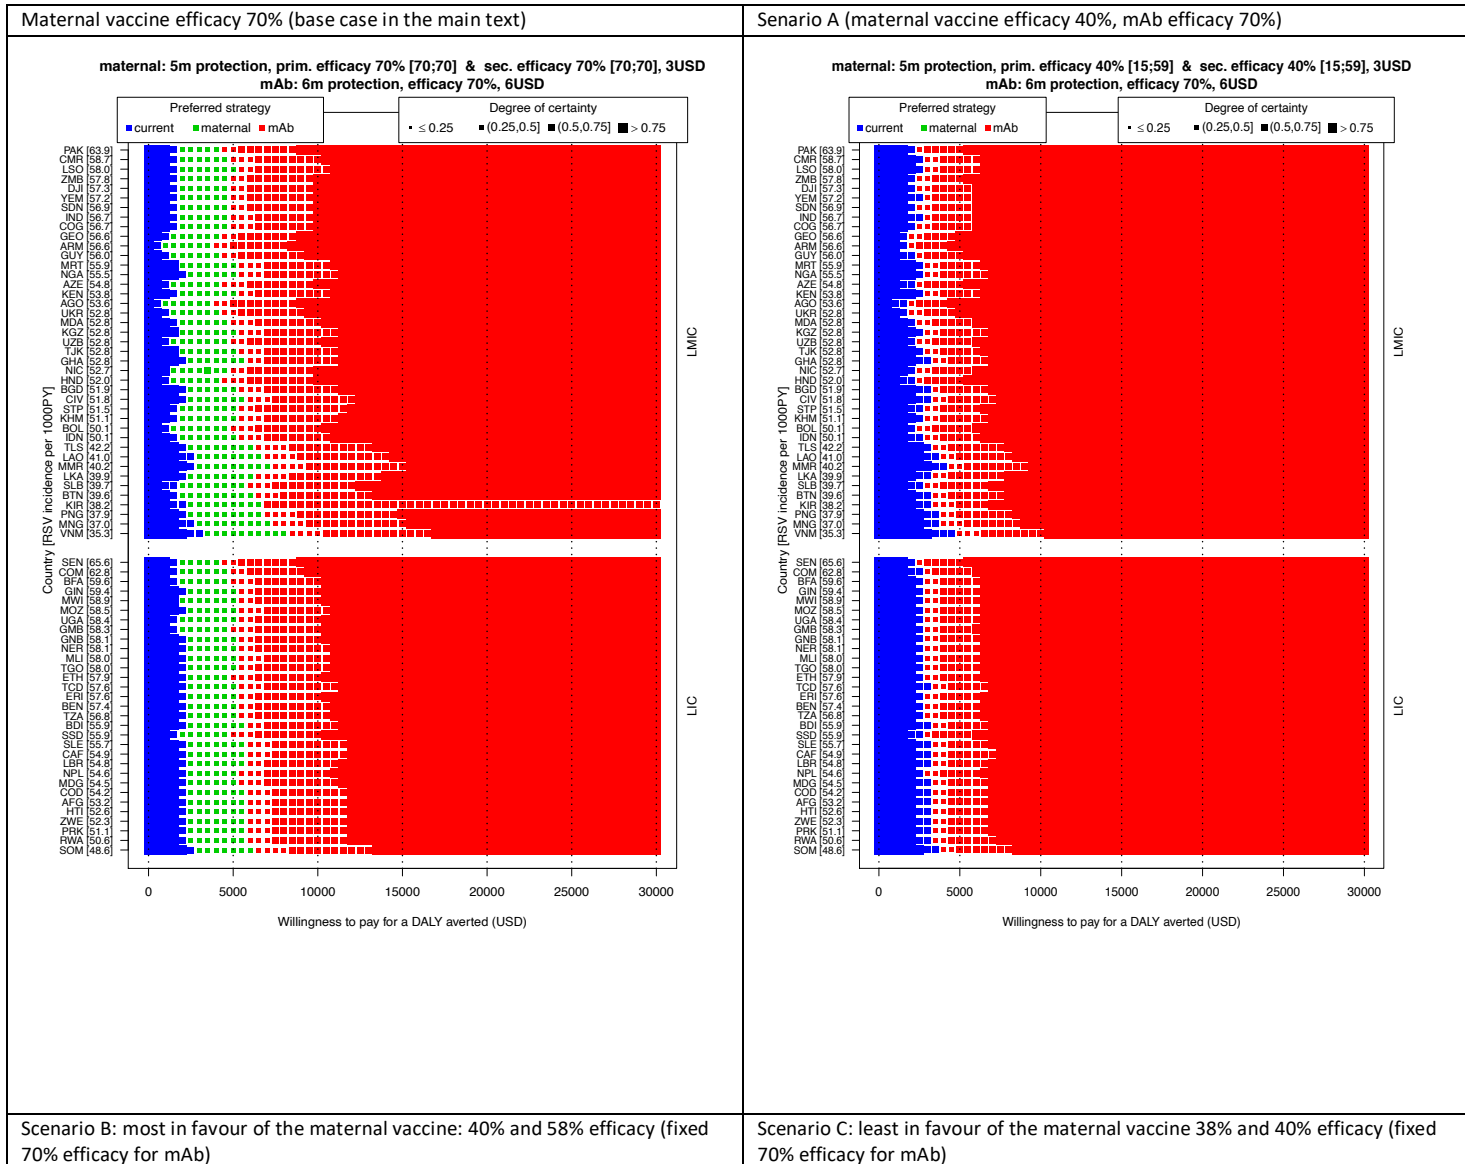

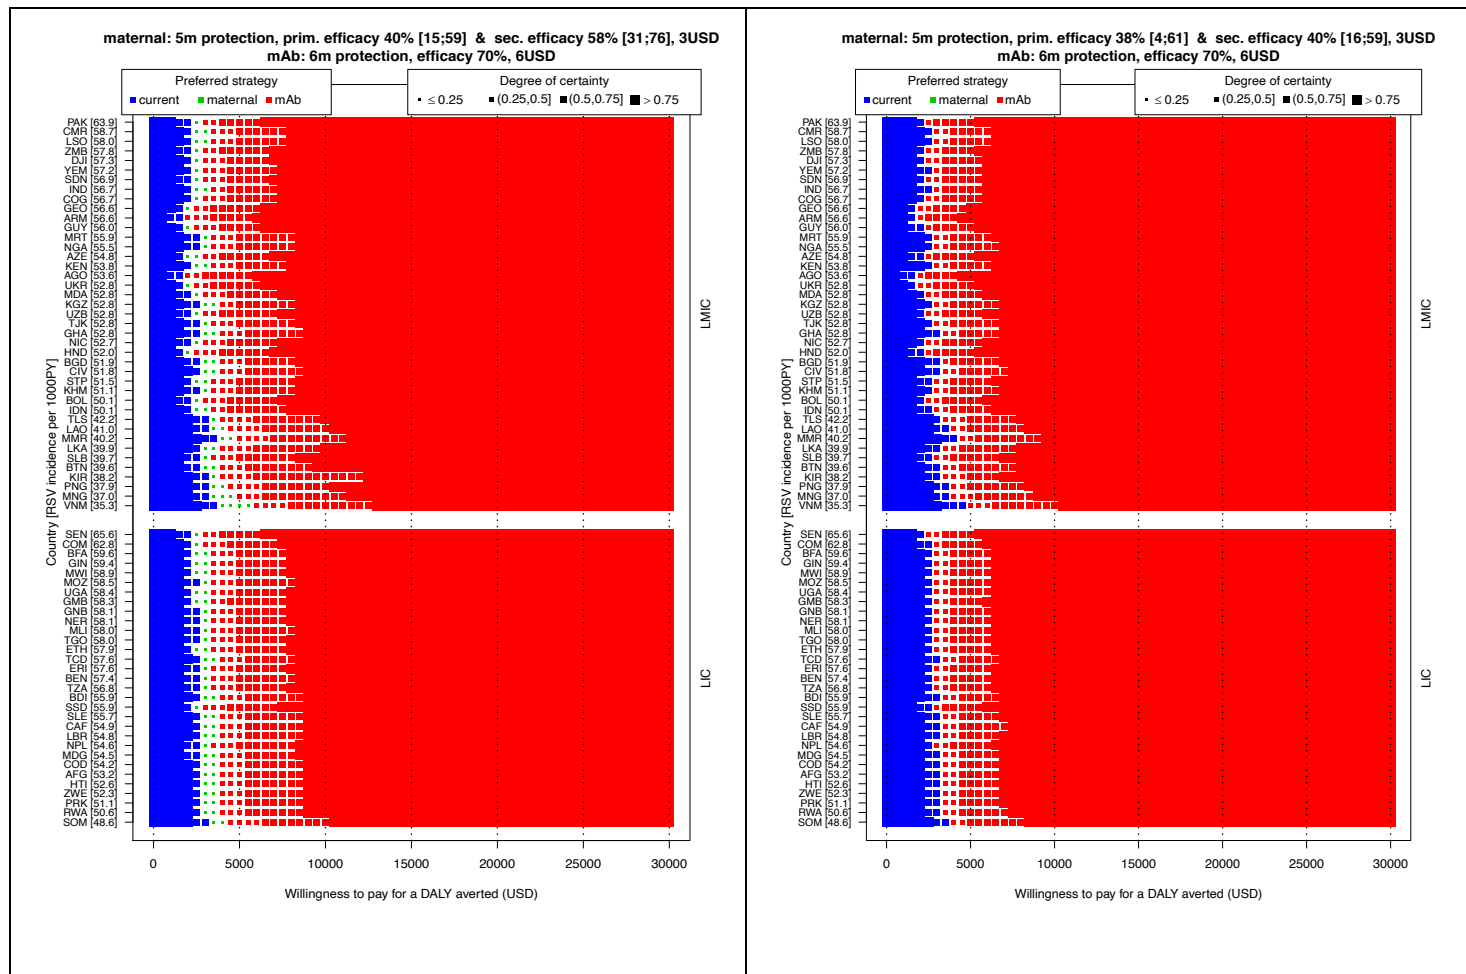

225 S. Figure 10: Cost-effectiveness analysis for different scenarios related to the trial-based maternal vaccine efficacy

226 Cost-effectiveness analysis for different scenarios related to the trial-based maternal vaccine efficacy. The optimal strategy for a WTP value is shown by the colours (the current strategy is no  
 227 intervention) and our certainty is indicated by the sizes of the markers. These results come from constructing a cost-effectiveness acceptability curve and a cost-effectiveness acceptability frontier for  
 228 each country for a range of WTP values (0-30,000 USD per DALY averted). Countries are ranked by RSV incidence rate (high to low in left Y-axis [per 1000 person-year]) and stratified by income  
 229 group (LIC or LMIC, on the right Y-axis).

230

### 3 References

231

1. Trevor HT, R; Friedman, J: **The Elements of Statistical Learning**:: Springer; 2009.

232

2. Nair H, Nokes DJ, Gessner BD, Dherani M, Madhi SA, Singleton RJ, O'Brien KL, Roca A, Wright PF, Bruce N *et al*: **Global burden of acute lower respiratory infections due to respiratory syncytial virus in young children: a systematic review and meta-analysis**. *Lancet* 2010, **375**(9725):1545-1555.

233

234

235

236

237

238

239

3. Shi T, McAllister DA, O'Brien KL, Simoes EAF, Madhi SA, Gessner BD, Polack FP, Balsells E, Acacio S, Aguayo C *et al*: **Global, regional, and national disease burden estimates of acute lower respiratory infections due to respiratory syncytial virus in young children in 2015: a systematic review and modelling study**. *Lancet* 2017, **390**(10098):946-958.

240

241

242

243

4. Nokes DJ, Okiro EA, Ngama M, Ochola R, White LJ, Scott PD, English M, Cane PA, Medley GF: **Respiratory syncytial virus infection and disease in infants and young children observed from birth in Kilifi District, Kenya**. *Clin Infect Dis* 2008, **46**(1):50-57.

244

245

246

247

5. Homaira N, Luby SP, Petri WA, Vainionpaa R, Rahman M, Hossain K, Snider CB, Rahman M, Alamgir AS, Zesmin F *et al*: **Incidence of respiratory virus-associated pneumonia in urban poor young children of Dhaka, Bangladesh, 2009-2011**. *PLoS One* 2012, **7**(2):e32056.

248

249

250

251

252

6. Briggs AC, K. Sculpher, M: **Decision Modelling for Health Economic Evaluation**. Oxford: Oxford University Press; 2006.

253

254

255

256

257

7. Stenberg K, Lauer JA, Gkountouras G, Fitzpatrick C, Stanciole A: **Econometric estimation of WHO-CHOICE country-specific costs for inpatient and outpatient health service delivery**. *Cost Eff Resour Alloc* 2018, **16**:11.

258

8. Zhang S, Sammon PM, King I, Andrade AL, Toscano CM, Araujo SN, Sinha A, Madhi SA, Khandaker G, Yin JK *et al*: **Cost of management of severe pneumonia in young children: systematic analysis**. *J Glob Health* 2016, **6**(1):010408.

9. Novavax: **Novavax Announces Topline Results from Phase 3 Prepare™ Trial of ResVax™ for Prevention of RSV Disease in Infants via Maternal Immunization**. In. Novavax website; 2019.

## 259 4 Long tables

260 S. Table 6: Estimated age-specific RSV cases in each country

| Country                          | ISO3 | Under 3months |                |        | 3-5 months |                |        | 6to11 months |                |        | 1to5 years |                |        | Population under 5 |
|----------------------------------|------|---------------|----------------|--------|------------|----------------|--------|--------------|----------------|--------|------------|----------------|--------|--------------------|
|                                  |      | RSV cases     | Hospital cases | Deaths | RSV cases  | Hospital cases | Deaths | RSV cases    | Hospital cases | Deaths | RSV cases  | Hospital cases | Deaths |                    |
| Afghanistan                      | AFG  | 6,844         | 60             | 23     | 29,821     | 2,607          | 77     | 62,526       | 5,454          | 135    | 170,629    | 14,872         | 283    | 5,067,270          |
| Angola                           | AGO  | 7,294         | 640            | 24     | 31,725     | 2,773          | 82     | 66,301       | 5,784          | 143    | 179,602    | 15,654         | 298    | 5,311,239          |
| Armenia                          | ARM  | 253           | 22             | 1      | 1,109      | 97             | 3      | 2,356        | 206            | 5      | 6,521      | 568            | 11     | 180,926            |
| Azerbaijan                       | AZE  | 1,050         | 92             | 3      | 4,597      | 402            | 12     | 9,709        | 847            | 21     | 26,739     | 2,331          | 44     | 768,347            |
| Burundi                          | BDI  | 2,750         | 241            | 9      | 11,943     | 1,044          | 31     | 24,895       | 2,172          | 54     | 67,090     | 5,848          | 111    | 1,907,468          |
| Benin                            | BEN  | 2,557         | 224            | 8      | 11,115     | 972            | 29     | 23,211       | 2,025          | 50     | 62,739     | 5,468          | 104    | 1,737,026          |
| BurkinaFaso                      | BFA  | 4,899         | 430            | 16     | 21,344     | 1,866          | 55     | 44,745       | 3,903          | 97     | 121,617    | 10,600         | 202    | 3,230,312          |
| Bangladesh                       | BGD  | 18,290        | 1,605          | 61     | 80,094     | 7,001          | 206    | 169,398      | 14,777         | 366    | 466,760    | 40,684         | 775    | 14,159,441         |
| Bolivia                          | BOL  | 1,459         | 128            | 5      | 6,379      | 558            | 16     | 13,456       | 1,174          | 29     | 36,844     | 3,211          | 61     | 1,159,411          |
| Bhutan                           | BTN  | 67            | 6              | 0      | 293        | 26             | 1      | 619          | 54             | 1      | 1,708      | 149            | 3      | 67,874             |
| Central African Republic         | CAF  | 942           | 83             | 3      | 4,079      | 357            | 11     | 8,463        | 738            | 18     | 22,666     | 1,976          | 38     | 658,371            |
| Côte d'Ivoire                    | CIV  | 5,102         | 448            | 17     | 22,211     | 1,942          | 57     | 46,502       | 4,057          | 101    | 126,304    | 11,009         | 210    | 3,860,241          |
| Cameroon                         | CMR  | 5,586         | 490            | 19     | 24,306     | 2,125          | 63     | 50,839       | 4,435          | 110    | 137,878    | 12,018         | 229    | 3,722,449          |
| Democratic Republic of the Congo | COD  | 20,098        | 1,763          | 67     | 87,350     | 7,636          | 225    | 182,309      | 15,903         | 394    | 492,805    | 42,953         | 819    | 14,432,777         |
| Congo                            | COG  | 1,164         | 102            | 4      | 5,081      | 444            | 13     | 10,695       | 933            | 23     | 29,280     | 2,552          | 49     | 815,693            |
| Comoros                          | COM  | 182           | 16             | 1      | 792        | 69             | 2      | 1,658        | 145            | 4      | 4,517      | 394            | 7      | 113,907            |
| Djibouti                         | DJI  | 136           | 12             | 0      | 594        | 52             | 2      | 1,244        | 108            | 3      | 3,380      | 295            | 6      | 93,485             |
| Eritrea                          | ERI  | 1,054         | 93             | 3      | 4,613      | 403            | 12     | 9,742        | 850            | 21     | 26,793     | 2,335          | 44     | 733,293            |
| Ethiopia                         | ETH  | 21,497        | 1,886          | 71     | 93,997     | 8,217          | 242    | 198,278      | 17,297         | 429    | 543,673    | 47,388         | 903    | 14,799,645         |
| Georgia                          | GEO  | 342           | 30             | 1      | 1,502      | 131            | 4      | 3,192        | 278            | 7      | 8,842      | 771            | 15     | 245,232            |
| Ghana                            | GHA  | 5,238         | 460            | 17     | 22,871     | 1,999          | 59     | 48,126       | 4,198          | 104    | 131,567    | 11,468         | 218    | 3,938,308          |
| Guinea                           | GIN  | 2,993         | 263            | 10     | 13,055     | 1,141          | 34     | 27,423       | 2,392          | 59     | 74,714     | 6,512          | 124    | 1,989,709          |
| Gambia                           | GMB  | 534           | 47             | 2      | 2,327      | 203            | 6      | 4,887        | 426            | 11     | 13,315     | 1,161          | 22     | 361,473            |
| Guinea-Bissau                    | GNB  | 410           | 36             | 1      | 1,781      | 156            | 5      | 3,712        | 324            | 8      | 9,988      | 871            | 17     | 273,468            |

|                                       |     |         |        |     |         |        |       |           |         |       |           |         |       |             |
|---------------------------------------|-----|---------|--------|-----|---------|--------|-------|-----------|---------|-------|-----------|---------|-------|-------------|
| Guyana                                | GUY | 100     | 9      | 0   | 439     | 38     | 1     | 926       | 81      | 2     | 2,544     | 222     | 4     | 71,595      |
| Honduras                              | HND | 1,210   | 106    | 4   | 5,300   | 463    | 14    | 11,211    | 978     | 24    | 30,859    | 2,690   | 51    | 934,603     |
| Haiti                                 | HTI | 1,530   | 134    | 5   | 6,677   | 584    | 17    | 14,038    | 1,225   | 30    | 38,262    | 3,335   | 64    | 1,151,138   |
| Indonesia                             | IDN | 28,695  | 2,518  | 95  | 125,732 | 10,991 | 324   | 266,201   | 23,222  | 576   | 734,454   | 64,017  | 1,219 | 23,060,901  |
| India                                 | IND | 163,157 | 14,315 | 540 | 713,225 | 62,347 | 1,837 | 1,503,865 | 131,189 | 3,252 | 4,129,534 | 359,939 | 6,855 | 114,873,924 |
| Kenya                                 | KEN | 9,486   | 832    | 31  | 41,456  | 3,624  | 107   | 87,368    | 7,621   | 189   | 239,613   | 20,885  | 398   | 7,028,272   |
| Kyrgyzstan                            | KGZ | 905     | 79     | 3   | 3,968   | 347    | 10    | 8,414     | 734     | 18    | 23,255    | 2,027   | 39    | 692,207     |
| Cambodia                              | KHM | 2,194   | 193    | 7   | 9,620   | 841    | 25    | 20,383    | 1,778   | 44    | 56,284    | 4,906   | 93    | 1,732,417   |
| Kiribati                              | KIR | 14      | 1      | -   | 61      | 5      | 0     | 128       | 11      | 0     | 351       | 31      | 1     | 14,506      |
| LaoPeople's Democratic Republic       | LAO | 742     | 65     | 2   | 3,241   | 283    | 8     | 6,825     | 595     | 15    | 18,722    | 1,632   | 31    | 720,784     |
| Liberia                               | LBR | 997     | 87     | 3   | 4,351   | 380    | 11    | 9,151     | 798     | 20    | 25,034    | 2,182   | 42    | 720,928     |
| SriLanka                              | LKA | 1,482   | 130    | 5   | 6,510   | 569    | 17    | 13,846    | 1,208   | 30    | 38,384    | 3,346   | 64    | 1,509,446   |
| Lesotho                               | LSO | 400     | 35     | 1   | 1,743   | 152    | 4     | 3,661     | 319     | 8     | 10,008    | 872     | 17    | 272,445     |
| Republicof Moldova                    | MDA | 253     | 22     | 1   | 1,112   | 97     | 3     | 2,360     | 206     | 5     | 6,531     | 569     | 11    | 194,256     |
| Madagascar                            | MDG | 5,344   | 469    | 18  | 23,394  | 2,045  | 60    | 49,445    | 4,313   | 107   | 135,930   | 11,848  | 226   | 3,932,142   |
| Mali                                  | MLI | 4,881   | 428    | 16  | 21,224  | 1,855  | 55    | 44,332    | 3,867   | 96    | 119,781   | 10,440  | 199   | 3,279,424   |
| Myanmar                               | MMR | 4,293   | 377    | 14  | 18,730  | 1,637  | 48    | 39,360    | 3,434   | 85    | 107,723   | 9,389   | 179   | 4,233,099   |
| Mongolia                              | MNG | 303     | 27     | 1   | 1,328   | 116    | 3     | 2,815     | 246     | 6     | 7,774     | 678     | 13    | 330,358     |
| Mozambique                            | MOZ | 7,389   | 648    | 24  | 32,117  | 2,807  | 83    | 67,046    | 5,849   | 145   | 181,427   | 15,813  | 301   | 4,919,848   |
| Mauritania                            | MRT | 914     | 80     | 3   | 3,971   | 347    | 10    | 8,282     | 723     | 18    | 22,437    | 1,956   | 37    | 637,248     |
| Malawi                                | MWI | 4,479   | 393    | 15  | 19,479  | 1,703  | 50    | 40,701    | 3,550   | 88    | 110,742   | 9,652   | 184   | 2,979,871   |
| Niger                                 | NER | 6,518   | 572    | 22  | 28,380  | 2,481  | 73    | 59,423    | 5,184   | 129   | 160,639   | 14,002  | 267   | 4,387,626   |
| Nigeria                               | NGA | 43,388  | 3,807  | 144 | 188,680 | 16,493 | 486   | 394,194   | 34,387  | 853   | 1,064,501 | 92,783  | 1,768 | 30,454,506  |
| Nicaragua                             | NIC | 741     | 65     | 2   | 3,248   | 284    | 8     | 6,890     | 601     | 15    | 19,048    | 1,660   | 32    | 567,996     |
| Nepal                                 | NPL | 3,641   | 319    | 12  | 15,944  | 1,394  | 41    | 33,717    | 2,941   | 73    | 92,940    | 8,101   | 154   | 2,679,582   |
| Pakistan                              | PAK | 37,366  | 3,278  | 124 | 162,381 | 14,194 | 418   | 338,872   | 29,561  | 733   | 920,510   | 80,233  | 1,528 | 22,848,453  |
| PapuaNewGuinea                        | PNG | 973     | 85     | 3   | 4,243   | 371    | 11    | 8,911     | 777     | 19    | 24,357    | 2,123   | 40    | 1,015,796   |
| Democratic People's Republic of Korea | PRK | 2,133   | 187    | 7   | 9,363   | 818    | 24    | 19,875    | 1,734   | 43    | 54,963    | 4,791   | 91    | 1,690,022   |

|                             |     |        |       |    |        |       |     |         |        |     |         |        |     |           |
|-----------------------------|-----|--------|-------|----|--------|-------|-----|---------|--------|-----|---------|--------|-----|-----------|
| Rwanda                      | RWA | 2,148  | 188   | 7  | 9,384  | 820   | 24  | 19,760  | 1,724  | 43  | 54,133  | 4,718  | 90  | 1,689,224 |
| Sudan                       | SDN | 8,446  | 741   | 28 | 36,845 | 3,221 | 95  | 77,400  | 6,752  | 167 | 211,083 | 18,398 | 351 | 5,870,091 |
| Senegal                     | SEN | 4,165  | 365   | 14 | 18,218 | 1,592 | 47  | 38,455  | 3,355  | 83  | 105,722 | 9,215  | 176 | 2,540,727 |
| Solomon Islands             | SLB | 79     | 7     | 0  | 348    | 30    | 1   | 736     | 64     | 2   | 2,030   | 177    | 3   | 80,476    |
| Sierra Leone                | SLE | 1,546  | 136   | 5  | 6,704  | 586   | 17  | 13,935  | 1,216  | 30  | 37,505  | 3,269  | 62  | 1,071,324 |
| Somalia                     | SOM | 3,284  | 288   | 11 | 14,258 | 1,246 | 37  | 29,701  | 2,591  | 64  | 79,911  | 6,965  | 133 | 2,615,103 |
| South Sudan                 | SSD | 2,717  | 238   | 9  | 11,810 | 1,032 | 30  | 24,652  | 2,150  | 53  | 66,587  | 5,804  | 111 | 1,891,616 |
| Sao Tome and Principe       | STP | 40     | 3     | 0  | 173    | 15    | 0   | 363     | 32     | 1   | 992     | 86     | 2   | 30,442    |
| Chad                        | TCO | 3,832  | 336   | 13 | 16,603 | 1,451 | 43  | 34,464  | 3,006  | 75  | 92,197  | 8,036  | 153 | 2,552,992 |
| Togo                        | TGO | 1,672  | 147   | 6  | 7,286  | 637   | 19  | 15,276  | 1,333  | 33  | 41,541  | 3,621  | 69  | 1,134,834 |
| Tajikistan                  | TJK | 1,526  | 134   | 5  | 6,672  | 583   | 17  | 14,070  | 1,227  | 30  | 38,650  | 3,369  | 64  | 1,154,235 |
| Timor-Leste                 | TLS | 217    | 19    | 1  | 950    | 83    | 2   | 2,006   | 175    | 4   | 5,514   | 481    | 9   | 206,013   |
| United Republic of Tanzania | TZA | 14,062 | 1,234 | 47 | 61,402 | 5,367 | 158 | 129,209 | 11,271 | 279 | 353,687 | 30,828 | 587 | 9,836,599 |
| Uganda                      | UGA | 11,657 | 1,023 | 39 | 50,755 | 4,437 | 131 | 106,268 | 9,270  | 230 | 288,681 | 25,162 | 479 | 7,826,974 |
| Ukraine                     | UKR | 2,926  | 257   | 10 | 12,853 | 1,124 | 33  | 27,332  | 2,384  | 59  | 75,759  | 6,603  | 126 | 2,251,488 |
| Uzbekistan                  | UZB | 4,005  | 351   | 13 | 17,528 | 1,532 | 45  | 37,029  | 3,230  | 80  | 101,982 | 8,889  | 169 | 3,041,357 |
| Viet Nam                    | VNM | 6,522  | 572   | 22 | 28,602 | 2,500 | 74  | 60,641  | 5,290  | 131 | 167,533 | 14,603 | 278 | 7,460,242 |
| Yemen                       | YEM | 5,626  | 494   | 19 | 24,550 | 2,146 | 63  | 51,610  | 4,502  | 112 | 141,186 | 12,306 | 234 | 3,899,965 |
| Zambia                      | ZMB | 4,251  | 373   | 14 | 18,542 | 1,621 | 48  | 38,947  | 3,398  | 84  | 106,320 | 9,267  | 177 | 2,905,622 |
| Zimbabwe                    | ZWE | 3,135  | 275   | 10 | 13,678 | 1,196 | 35  | 28,752  | 2,508  | 62  | 78,592  | 6,850  | 130 | 2,375,407 |

261

262 *S. Table 7: Average outpatient and inpatient costs of the 72 Gavi countries in USD at 2016 value*

| Country     | ISO3 | Income Region | Outpatient mean [95% CI#] | Inpatient mean [95% CI#]  |
|-------------|------|---------------|---------------------------|---------------------------|
| Afghanistan | AFG  | LIC           | 10.46 [1.01 - 37.71]      | 24.25 [7.30 - 54.47]      |
| Angola      | AGO  | LMIC          | 134.96 [9.35 - 491.89]    | 640.91 [189.90 - 1442.09] |
| Armenia     | ARM  | LMIC          | 107.91 [6.17 - 404.85]    | 511.37 [146.30 - 1142.78] |
| Azerbaijan  | AZE  | UMIC          | 92.73 [7.90 - 331.96]     | 540.45 [159.88 - 1218.00] |
| Bangladesh* | BGD  | LMIC          | 10.93 [3.58 - 26.17]      | 174.60 [167.86 - 181.45]  |
| Benin       | BEN  | LIC           | 29.48 [1.98 - 111.16]     | 92.28 [30.08 - 203.06]    |

|                                       |     |      |                          |                            |
|---------------------------------------|-----|------|--------------------------|----------------------------|
| Bhutan                                | BTN | LMIC | 79.28 [5.68 - 287.22]    | 386.51 [107.01 - 884.37]   |
| Bolivia                               | BOL | LMIC | 94.02 [8.61 - 332.93]    | 424.18 [120.09 - 985.44]   |
| Burkina Faso                          | BFA | LIC  | 24.69 [1.71 - 92.28]     | 72.99 [21.13 - 160.88]     |
| Burundi                               | BDI | LIC  | 12.51 [0.96 - 44.78]     | 27.79 [7.92 - 64.23]       |
| Côte d'Ivoire                         | CIV | LMIC | 38.40 [3.28 - 140.51]    | 136.98 [37.17 - 308.85]    |
| Cambodia                              | KHM | LMIC | 41.20 [3.53 - 150.57]    | 152.53 [42.78 - 336.04]    |
| Cameroon                              | CMR | LMIC | 25.75 [2.18 - 90.54]     | 67.87 [19.71 - 151.32]     |
| Central African Republic              | CAF | LIC  | 26.06 [1.89 - 94.42]     | 78.58 [22.10 - 182.50]     |
| Chad                                  | TCD | LIC  | 34.28 [3.50 - 116.07]    | 95.47 [26.97 - 219.45]     |
| Comoros                               | COM | LIC  | 52.60 [4.17 - 194.75]    | 233.90 [73.80 - 514.33]    |
| Congo                                 | COG | LMIC | 42.90 [3.95 - 160.76]    | 143.85 [40.55 - 331.64]    |
| Democratic People's Republic of Korea | PRK | LIC  | 353.45 [26.91 - 1303.18] | 2043.01 [549.38 - 4602.86] |
| Democratic Republic of the Congo      | COD | LIC  | 10.44 [1.04 - 36.23]     | 24.30 [7.23 - 52.11]       |
| Djibouti                              | DJI | LMIC | 12.73 [1.19 - 45.44]     | 25.70 [6.79 - 58.16]       |
| Eritrea                               | ERI | LIC  | 66.64 [6.76 - 225.98]    | 240.40 [68.18 - 534.79]    |
| Ethiopia                              | ETH | LIC  | 14.34 [4.19 - 36.84]     | 31.00 [9.09 - 70.78]       |
| Gambia                                | GMB | LIC  | 23.10 [1.87 - 83.92]     | 62.55 [17.94 - 138.24]     |
| Georgia                               | GEO | LMIC | 28.73 [2.54 - 98.84]     | 101.28 [28.14 - 235.47]    |
| Ghana                                 | GHA | LMIC | 94.08 [8.59 - 325.28]    | 428.56 [123.13 - 944.32]   |
| Guinea*                               | GIN | LIC  | 30.92 [2.20 - 114.36]    | 103.74 [26.74 - 242.74]    |
| Guinea-Bissau                         | GNB | LIC  | 2.72 [0.60 - 7.88]       | 95.77 [19.80 - 290.47]     |
| Guyana                                | GUY | UMIC | 25.99 [1.91 - 98.39]     | 76.17 [24.57 - 168.22]     |
| Haiti                                 | HTI | LIC  | 82.28 [5.44 - 288.37]    | 330.88 [97.32 - 741.20]    |
| Honduras                              | HND | LMIC | 24.72 [1.68 - 88.91]     | 70.48 [21.32 - 154.10]     |
| India*                                | IND | LMIC | 89.91 [7.31 - 329.05]    | 381.34 [109.02 - 870.73]   |
| Indonesia*                            | IDN | LMIC | 41.83 [3.50 - 148.69]    | 58.20 [21.76 - 123.97]     |
| Kenya*                                | KEN | LMIC | 62.42 [4.66 - 224.05]    | 176.77 [39.14 - 521.02]    |
| Kiribati                              | KIR | LMIC | 41.26 [3.36 - 143.99]    | 176.21 [117.77 - 251.27]   |
| Kyrgyzstan                            | KGZ | LMIC | 90.62 [7.48 - 330.93]    | 321.58 [97.87 - 735.09]    |
| Lao PDR                               | LAO | LMIC | 38.20 [2.51 - 147.94]    | 129.64 [35.10 - 296.29]    |
| Lesotho                               | LSO | LMIC | 44.94 [4.37 - 150.20]    | 169.49 [51.83 - 374.98]    |
| Liberia                               | LBR | LIC  | 33.95 [2.97 - 122.27]    | 110.42 [33.29 - 243.20]    |
| Madagascar                            | MDG | LIC  | 0.24 [0.01 - 1.04]       | 0.37 [0.10 - 0.88]         |
| Malawi                                | MWI | LIC  | 14.64 [1.22 - 52.11]     | 38.02 [11.11 - 86.21]      |

|                       |     |      |                         |                           |
|-----------------------|-----|------|-------------------------|---------------------------|
| Mali                  | MLI | LIC  | 12.66 [0.99 - 46.95]    | 32.98 [9.40 - 73.50]      |
| Mauritania            | MRT | LMIC | 25.12 [2.09 - 90.71]    | 73.55 [21.68 - 162.18]    |
| Mongolia              | MNG | LMIC | 33.69 [2.88 - 123.15]   | 118.92 [35.57 - 258.09]   |
| Mozambique            | MOZ | LIC  | 56.71 [5.10 - 200.37]   | 258.94 [76.94 - 576.35]   |
| Myanmar               | MMR | LMIC | 16.27 [1.42 - 57.76]    | 42.83 [13.13 - 93.44]     |
| Nepal                 | NPL | LIC  | 14.67 [1.20 - 55.47]    | 41.59 [11.36 - 92.26]     |
| Nicaragua             | NIC | LMIC | 21.26 [1.93 - 77.57]    | 65.88 [16.38 - 155.18]    |
| Niger                 | NER | LIC  | 65.24 [6.45 - 223.20]   | 288.48 [82.32 - 646.33]   |
| Nigeria               | NGA | LMIC | 15.06 [1.03 - 55.68]    | 32.54 [9.50 - 73.75]      |
| Pakistan*             | PAK | LMIC | 45.23 [3.39 - 167.33]   | 167.53 [50.32 - 376.52]   |
| Papua New Guinea      | PNG | LMIC | 42.94 [3.75 - 196.12]   | 138.20 [24.26 - 455.46]   |
| Republic of Moldova   | MDA | LMIC | 75.90 [5.62 - 285.71]   | 272.80 [71.71 - 630.77]   |
| Rwanda                | RWA | LIC  | 54.79 [4.17 - 190.71]   | 223.97 [69.10 - 490.82]   |
| Sao Tome and Principe | STP | LMIC | 26.11 [2.22 - 96.64]    | 70.86 [18.69 - 166.28]    |
| Senegal               | SEN | LIC  | 50.51 [4.23 - 189.49]   | 175.04 [51.12 - 387.79]   |
| Sierra Leone          | SLE | LIC  | 36.36 [3.38 - 133.30]   | 120.82 [37.21 - 267.81]   |
| Solomon Islands       | SLB | LMIC | 22.27 [1.65 - 80.45]    | 61.53 [19.38 - 136.65]    |
| Somalia               | SOM | LIC  | 125.59 [11.12 - 453.43] | 478.38 [135.09 - 1079.00] |
| South Sudan           | SSD | LIC  | 14.28 [4.29 - 36.36]    | 30.89 [8.81 - 68.57]      |
| Sri Lanka             | LKA | LMIC | 67.96 [3.76 - 254.66]   | 252.61 [73.33 - 566.73]   |
| Sudan                 | SDN | LMIC | 72.88 [5.57 - 258.76]   | 341.13 [102.88 - 746.80]  |
| Tajikistan            | TJK | LMIC | 69.78 [3.68 - 265.64]   | 252.18 [68.48 - 579.54]   |
| Timor-Leste           | TLS | LMIC | 27.40 [2.12 - 98.05]    | 94.80 [27.64 - 211.70]    |
| Togo                  | TGO | LIC  | 54.87 [3.92 - 196.47]   | 167.47 [45.93 - 384.45]   |
| Uganda                | UGA | LIC  | 21.40 [1.88 - 79.03]    | 58.81 [19.05 - 125.51]    |
| Ukraine               | UKR | LMIC | 22.55 [1.87 - 81.41]    | 68.14 [18.00 - 151.01]    |
| Tanzania              | TZA | LIC  | 76.74 [6.09 - 284.31]   | 387.79 [112.96 - 858.65]  |
| Uzbekistan            | UZB | LMIC | 24.44 [1.98 - 88.68]    | 72.99 [19.62 - 166.73]    |
| Viet Nam*             | VNM | LMIC | 73.12 [6.32 - 268.97]   | 282.71 [85.92 - 626.02]   |
| Yemen                 | YEM | LMIC | 5.92 [1.33 - 16.84]     | 58.82 [48.52 - 70.40]     |
| Zambia*               | ZMB | LMIC | 64.19 [6.24 - 225.95]   | 244.25 [72.41 - 546.89]   |
| Zimbabwe              | ZWE | LIC  | 52.07 [12.06 - 149.68]  | 240.22 [53.62 - 718.79]   |

# CI: credible interval; \* indicates the country specific treatment costs estimated by meta-analysis of multiple costs data

263  
264



265 S. Table 8: Country-specific estimated mean of RSV-associated disease burden and the impact of interventions

| Country                          | ISO3 | Cases averted          | Hospital admission averted | Deaths Averted | DALYs Averted      | Averted Treatment Costs ('000) | Cost of intervention (inc delivery costs) ('000) | Incremental costs ('000) | Average cost-effectiveness ratio |
|----------------------------------|------|------------------------|----------------------------|----------------|--------------------|--------------------------------|--------------------------------------------------|--------------------------|----------------------------------|
| mAb vs. no intervention          |      |                        |                            |                |                    |                                |                                                  |                          |                                  |
| Afghanistan                      | AFG  | 22328 [12706 - 34470]  | 1953 [378 - 5743]          | 61 [10 - 190]  | 1767 [301 - 5464]  | 176 [32 - 541]                 | 5815 [5815 - 5815]                               | 5640 [5274 - 5783]       | 5507 [1018 - 18979]              |
| Angola                           | AGO  | 15842 [9028 - 24422]   | 1386 [269 - 4071]          | 43 [7 - 135]   | 1240 [212 - 3838]  | 2226 [419 - 6951]              | 4119 [4119 - 4119]                               | 1893 [-2832 - 3700]      | 3152 [-1886 - 14228]             |
| Armenia                          | ARM  | 944 [535 - 1461]       | 83 [16 - 243]              | 3 [0 - 8]      | 77 [13 - 240]      | 95 [18 - 278]                  | 228 [228 - 228]                                  | 133 [-51 - 210]          | 3335 [-465 - 13578]              |
| Azerbaijan                       | AZE  | 3874 [2199 - 5993]     | 339 [66 - 998]             | 11 [2 - 33]    | 315 [54 - 976]     | 291 [58 - 823]                 | 972 [972 - 972]                                  | 681 [148 - 914]          | 4114 [197 - 15828]               |
| Burundi                          | BDI  | 9565 [5459 - 14727]    | 837 [162 - 2457]           | 26 [4 - 81]    | 736 [126 - 2275]   | 83 [14 - 252]                  | 2396 [2396 - 2396]                               | 2313 [2143 - 2381]       | 5415 [1010 - 18586]              |
| Benin                            | BEN  | 9283 [5293 - 14306]    | 812 [157 - 2386]           | 25 [4 - 79]    | 724 [124 - 2241]   | 153 [32 - 453]                 | 2261 [2261 - 2261]                               | 2109 [1808 - 2230]       | 5066 [886 - 17383]               |
| Burkina Faso                     | BFA  | 18003 [10256 - 27762]  | 1575 [305 - 4628]          | 49 [8 - 153]   | 1404 [240 - 4343]  | 344 [61 - 1067]                | 4197 [4197 - 4197]                               | 3853 [3130 - 4136]       | 4770 [823 - 16577]               |
| Bangladesh                       | BGD  | 68181 [38711 - 105466] | 5964 [1155 - 17564]        | 185 [29 - 581] | 5582 [948 - 17282] | 1281 [369 - 3344]              | 18043 [18043 - 18043]                            | 16762 [14700 - 17675]    | 5289 [876 - 18455]               |
| Bolivia                          | BOL  | 5267 [2996 - 8134]     | 461 [89 - 1355]            | 14 [2 - 45]    | 427 [73 - 1320]    | 424 [84 - 1196]                | 1449 [1449 - 1449]                               | 1025 [253 - 1365]        | 4449 [273 - 16800]               |
| Bhutan                           | BTN  | 249 [141 - 385]        | 22 [4 - 64]                | 1 [0 - 2]      | 20 [3 - 63]        | 22 [4 - 64]                    | 86 [86 - 86]                                     | 65 [22 - 82]             | 5811 [503 - 20727]               |
| Central African Republic         | CAF  | 2179 [1245 - 3351]     | 191 [37 - 559]             | 6 [1 - 19]     | 164 [28 - 506]     | 24 [5 - 66]                    | 559 [559 - 559]                                  | 535 [493 - 554]          | 5646 [1013 - 19473]              |
| Côte d'Ivoire                    | CIV  | 18163 [10348 - 28008]  | 1589 [308 - 4668]          | 49 [8 - 155]   | 1364 [233 - 4217]  | 499 [107 - 1459]               | 4877 [4877 - 4877]                               | 4378 [3417 - 4770]       | 5611 [893 - 19519]               |
| Cameroon                         | CMR  | 14647 [8347 - 22582]   | 1281 [248 - 3764]          | 40 [6 - 125]   | 1133 [194 - 3506]  | 361 [72 - 1028]                | 3475 [3475 - 3475]                               | 3115 [2447 - 3403]       | 4836 [764 - 16794]               |
| Democratic Republic of the Congo | COD  | 69197 [39466 - 106603] | 6053 [1174 - 17781]        | 188 [30 - 589] | 5392 [921 - 16675] | 572 [107 - 1703]               | 17835 [17835 - 17835]                            | 17263 [16132 - 17728]    | 5519 [1023 - 18811]              |
| Congo                            | COG  | 3584 [2038 - 5538]     | 314 [61 - 923]             | 10 [2 - 31]    | 285 [49 - 882]     | 163 [33 - 461]                 | 874 [874 - 874]                                  | 711 [413 - 841]          | 4469 [595 - 16169]               |
| Comoros                          | COM  | 641 [365 - 989]        | 56 [11 - 165]              | 2 [0 - 5]      | 51 [9 - 156]       | 13 [3 - 40]                    | 142 [142 - 142]                                  | 129 [102 - 139]          | 4459 [761 - 15487]               |
| Djibouti                         | DJI  | 460 [262 - 709]        | 40 [8 - 118]               | 1 [0 - 4]      | 36 [6 - 111]       | 22 [4 - 63]                    | 112 [112 - 112]                                  | 89 [49 - 107]            | 4452 [555 - 15924]               |

|                                  |     |                          |                       |                   |                       |                      |                          |                         |                     |
|----------------------------------|-----|--------------------------|-----------------------|-------------------|-----------------------|----------------------|--------------------------|-------------------------|---------------------|
| Eritrea                          | ERI | 3848 [2186 - 5948]       | 337 [65 - 991]        | 10 [2 - 33]       | 306 [52 - 948]        | 33 [10 - 80]         | 920 [920 - 920]          | 887 [839 - 910]         | 5002 [918 - 17163]  |
| Ethiopia                         | ETH | 74378 [42292 - 114899]   | 6506 [1260 - 19145]   | 202 [32 - 633]    | 5936 [1011 - 18361]   | 829 [171 - 2398]     | 17699 [17699 - 17699]    | 16870 [15301 - 17528]   | 4934 [893 - 16984]  |
| Georgia                          | GEO | 1265 [717 - 1959]        | 111 [21 - 326]        | 3 [1 - 11]        | 103 [18 - 320]        | 109 [22 - 308]       | 305 [305 - 305]          | 196 [-3 - 283]          | 3592 [-20 - 13855]  |
| Ghana                            | GHA | 18496 [10520 - 28565]    | 1618 [313 - 4759]     | 50 [8 - 158]      | 1453 [248 - 4491]     | 382 [70 - 1136]      | 4847 [4847 - 4847]       | 4465 [3710 - 4776]      | 5368 [922 - 18882]  |
| Guinea                           | GIN | 9661 [5503 - 14901]      | 845 [164 - 2484]      | 26 [4 - 82]       | 756 [129 - 2339]      | 90 [14 - 349]        | 2256 [2256 - 2256]       | 2165 [1906 - 2242]      | 4987 [878 - 17264]  |
| Gambia                           | GMB | 1963 [1117 - 3029]       | 172 [33 - 505]        | 5 [1 - 17]        | 153 [26 - 472]        | 52 [11 - 152]        | 467 [467 - 467]          | 415 [315 - 456]         | 4752 [793 - 16790]  |
| Guinea-Bissau                    | GNB | 1273 [727 - 1959]        | 111 [22 - 327]        | 3 [1 - 11]        | 98 [17 - 303]         | 24 [4 - 74]          | 307 [307 - 307]          | 283 [233 - 303]         | 5014 [868 - 17159]  |
| Guyana                           | GUY | 358 [204 - 554]          | 31 [6 - 92]           | 1 [0 - 3]         | 29 [5 - 88]           | 28 [5 - 81]          | 88 [88 - 88]             | 60 [7 - 83]             | 3902 [129 - 14256]  |
| Honduras                         | HND | 4511 [2562 - 6977]       | 395 [76 - 1162]       | 12 [2 - 38]       | 370 [63 - 1145]       | 386 [74 - 1148]      | 1192 [1192 - 1192]       | 806 [44 - 1118]         | 4043 [68 - 15311]   |
| Haiti                            | HTI | 3619 [2060 - 5586]       | 317 [61 - 931]        | 10 [2 - 31]       | 285 [49 - 882]        | 54 [10 - 156]        | 954 [954 - 954]          | 900 [798 - 944]         | 5482 [987 - 18892]  |
| Indonesia                        | IDN | 97289 [55212 - 150555]   | 8510 [1648 - 25070]   | 264 [42 - 829]    | 7825 [1331 - 24222]   | 5719 [888 - 18719]   | 26630 [26630 - 26630]    | 20911 [7911 - 25742]    | 4767 [506 - 17291]  |
| India                            | IND | 545986 [310222 - 844007] | 47760 [9250 - 140587] | 1481 [233 - 4651] | 43988 [7483 - 136118] | 16838 [2632 - 56286] | 132743 [132743 - 132743] | 115905 [76457 - 130111] | 4597 [766 - 16054]  |
| Kenya                            | KEN | 30668 [17428 - 47400]    | 2683 [520 - 7896]     | 83 [13 - 261]     | 2452 [417 - 7587]     | 1122 [258 - 3187]    | 7865 [7865 - 7865]       | 6743 [4678 - 7607]      | 4868 [733 - 17389]  |
| Kyrgyzstan                       | KGZ | 3309 [1877 - 5122]       | 289 [56 - 853]        | 9 [1 - 28]        | 268 [45 - 828]        | 75 [15 - 220]        | 858 [858 - 858]          | 782 [638 - 843]         | 5124 [869 - 17866]  |
| Cambodia                         | KHM | 8187 [4647 - 12669]      | 716 [139 - 2110]      | 22 [3 - 70]       | 660 [112 - 2044]      | 283 [51 - 807]       | 2196 [2196 - 2196]       | 1913 [1389 - 2145]      | 5098 [805 - 17976]  |
| Kiribati                         | KIR | 41 [24 - 64]             | 4 [1 - 11]            | 0 [0 - 0]         | 3 [1 - 10]            | 4 [1 - 11]           | 15 [15 - 15]             | 11 [4 - 14]             | Inf [574 - 14431]   |
| Lao People's Democratic Republic | LAO | 2175 [1236 - 3361]       | 190 [37 - 560]        | 6 [1 - 19]        | 174 [30 - 539]        | 81 [17 - 231]        | 732 [732 - 732]          | 652 [501 - 716]         | 6572 [1085 - 23087] |
| Liberia                          | LBR | 3631 [2066 - 5606]       | 318 [62 - 934]        | 10 [2 - 31]       | 287 [49 - 886]        | 1 [0 - 2]            | 916 [916 - 916]          | 915 [914 - 916]         | 5488 [1032 - 18684] |
| Sri Lanka                        | LKA | 5538 [3140 - 8579]       | 484 [94 - 1428]       | 15 [2 - 47]       | 456 [77 - 1412]       | 381 [78 - 1087]      | 1893 [1893 - 1893]       | 1512 [806 - 1815]       | 5978 [712 - 21810]  |
| Lesotho                          | LSO | 1020 [580 - 1575]        | 89 [17 - 262]         | 3 [0 - 9]         | 76 [13 - 235]         | 31 [6 - 89]          | 243 [243 - 243]          | 213 [154 - 237]         | 4894 [788 - 16999]  |
| Republic of Moldova              | MDA | 927 [526 - 1435]         | 81 [16 - 239]         | 3 [0 - 8]         | 75 [13 - 232]         | 55 [11 - 163]        | 240 [240 - 240]          | 185 [76 - 229]          | 4427 [486 - 16176]  |

|                                       |     |                         |                      |                 |                     |                    |                       |                       |                     |
|---------------------------------------|-----|-------------------------|----------------------|-----------------|---------------------|--------------------|-----------------------|-----------------------|---------------------|
| Madagascar                            | MDG | 18508 [10516 - 28608]   | 1619 [314 - 4766]    | 50 [8 - 158]    | 1477 [251 - 4570]   | 165 [31 - 487]     | 4674 [4674 - 4674]    | 4509 [4187 - 4643]    | 5279 [976 - 18302]  |
| Mali                                  | MLI | 16812 [9592 - 25891]    | 1471 [285 - 4320]    | 46 [7 - 143]    | 1301 [222 - 4021]   | 228 [49 - 645]     | 4050 [4050 - 4050]    | 3822 [3405 - 4001]    | 5099 [915 - 17417]  |
| Myanmar                               | MMR | 14182 [8062 - 21915]    | 1241 [240 - 3651]    | 38 [6 - 121]    | 1129 [192 - 3494]   | 183 [33 - 582]     | 4880 [4880 - 4880]    | 4697 [4298 - 4847]    | 7189 [1336 - 24773] |
| Mongolia                              | MNG | 1130 [641 - 1749]       | 99 [19 - 291]        | 3 [0 - 10]      | 91 [15 - 281]       | 67 [13 - 189]      | 418 [418 - 418]       | 352 [229 - 405]       | 6857 [1027 - 24421] |
| Mozambique                            | MOZ | 27378 [15608 - 42194]   | 2395 [464 - 7035]    | 74 [12 - 233]   | 2118 [362 - 6550]   | 307 [57 - 912]     | 6532 [6532 - 6532]    | 6225 [5620 - 6475]    | 5083 [936 - 17458]  |
| Mauritania                            | MRT | 3385 [1928 - 5220]      | 296 [57 - 870]       | 9 [1 - 29]      | 266 [45 - 824]      | 80 [17 - 230]      | 846 [846 - 846]       | 766 [616 - 829]       | 5037 [829 - 17518]  |
| Malawi                                | MWI | 14423 [8210 - 22260]    | 1262 [245 - 3709]    | 39 [6 - 123]    | 1139 [194 - 3523]   | 156 [27 - 493]     | 3410 [3410 - 3410]    | 3254 [2917 - 3383]    | 4937 [918 - 17026]  |
| Niger                                 | NER | 24184 [13795 - 37252]   | 2115 [410 - 6215]    | 66 [10 - 206]   | 1887 [322 - 5836]   | 244 [40 - 785]     | 5805 [5805 - 5805]    | 5561 [5021 - 5765]    | 5087 [932 - 17449]  |
| Nigeria                               | NGA | 94220 [53758 - 145104]  | 8242 [1598 - 24209]  | 256 [40 - 802]  | 7079 [1212 - 21876] | 2721 [550 - 7876]  | 23721 [23721 - 23721] | 21000 [15845 - 23171] | 5218 [842 - 18026]  |
| Nicaragua                             | NIC | 2764 [1568 - 4279]      | 242 [47 - 712]       | 8 [1 - 24]      | 228 [39 - 706]      | 175 [37 - 485]     | 718 [718 - 718]       | 543 [233 - 681]       | 4309 [468 - 15831]  |
| Nepal                                 | NPL | 12750 [7238 - 19724]    | 1115 [216 - 3285]    | 35 [5 - 109]    | 1035 [176 - 3203]   | 195 [37 - 562]     | 3207 [3207 - 3207]    | 3011 [2645 - 3169]    | 5057 [910 - 17417]  |
| Pakistan                              | PAK | 124442 [70859 - 191996] | 10885 [2110 - 31992] | 338 [53 - 1060] | 9944 [1694 - 30756] | 4658 [690 - 17192] | 27158 [27158 - 27158] | 22500 [9966 - 26469]  | 3997 [495 - 14220]  |
| Papua New Guinea                      | PNG | 2629 [1495 - 4061]      | 230 [45 - 677]       | 7 [1 - 22]      | 209 [36 - 645]      | 200 [36 - 644]     | 961 [961 - 961]       | 760 [317 - 925]       | 6495 [744 - 23732]  |
| Democratic People's Republic of Korea | PRK | 7806 [4428 - 12084]     | 683 [132 - 2012]     | 21 [3 - 66]     | 633 [108 - 1961]    | 76 [14 - 241]      | 2089 [2089 - 2089]    | 2013 [1848 - 2075]    | 5492 [1012 - 18803] |
| Rwanda                                | RWA | 7992 [4543 - 12350]     | 699 [135 - 2058]     | 22 [3 - 68]     | 640 [109 - 1981]    | 145 [28 - 441]     | 2182 [2182 - 2182]    | 2037 [1740 - 2154]    | 5528 [985 - 19061]  |
| Sudan                                 | SDN | 30436 [17318 - 46987]   | 2662 [516 - 7829]    | 83 [13 - 259]   | 2409 [411 - 7449]   | 1593 [283 - 4575]  | 7418 [7418 - 7418]    | 5825 [2843 - 7135]    | 4344 [514 - 15520]  |
| Senegal                               | SEN | 15198 [8634 - 23495]    | 1329 [257 - 3913]    | 41 [6 - 129]    | 1217 [207 - 3766]   | 428 [87 - 1285]    | 3190 [3190 - 3190]    | 2762 [1905 - 3103]    | 4004 [606 - 14285]  |
| Solomon Islands                       | SLB | 239 [136 - 370]         | 21 [4 - 62]          | 1 [0 - 2]       | 19 [3 - 60]         | 29 [6 - 86]        | 83 [83 - 83]          | 53 [-3 - 77]          | 5129 [-124 - 19445] |
| Sierra Leone                          | SLE | 5313 [3034 - 8176]      | 465 [90 - 1364]      | 14 [2 - 45]     | 394 [68 - 1216]     | 106 [19 - 330]     | 1339 [1339 - 1339]    | 1233 [1009 - 1320]    | 5414 [958 - 18630]  |
| Somalia                               | SOM | 7245 [4136 - 11151]     | 634 [123 - 1860]     | 20 [3 - 62]     | 555 [95 - 1714]     | 32 [9 - 85]        | 2090 [2090 - 2090]    | 2058 [2005 - 2081]    | 6388 [1184 - 21785] |

|                              |     |                       |                    |                |                    |                   |                       |                       |                     |
|------------------------------|-----|-----------------------|--------------------|----------------|--------------------|-------------------|-----------------------|-----------------------|---------------------|
| South Sudan                  | SSD | 5288 [3017 - 8144]    | 463 [90 - 1359]    | 14 [2 - 45]    | 406 [69 - 1256]    | 273 [50 - 801]    | 1322 [1322 - 1322]    | 1049 [521 - 1273]     | 4621 [557 - 16812]  |
| Sao Tome and Principe        | STP | 137 [78 - 211]        | 12 [2 - 35]        | 0 [0 - 1]      | 11 [2 - 34]        | 7 [1 - 20]        | 37 [37 - 37]          | 30 [17 - 35]          | 4896 [682 - 17159]  |
| Chad                         | TCD | 10729 [6133 - 16495]  | 938 [182 - 2752]   | 29 [5 - 91]    | 802 [137 - 2475]   | 141 [28 - 420]    | 2625 [2625 - 2625]    | 2484 [2204 - 2596]    | 5372 [961 - 18482]  |
| Togo                         | TGO | 4954 [2820 - 7643]    | 433 [84 - 1274]    | 13 [2 - 42]    | 384 [66 - 1187]    | 73 [14 - 209]     | 1188 [1188 - 1188]    | 1115 [979 - 1174]     | 5032 [915 - 17309]  |
| Tajikistan                   | TJK | 5624 [3195 - 8695]    | 492 [95 - 1448]    | 15 [2 - 48]    | 457 [78 - 1414]    | 136 [26 - 396]    | 1468 [1468 - 1468]    | 1332 [1072 - 1442]    | 5096 [870 - 17617]  |
| Timor-Leste                  | TLS | 777 [441 - 1200]      | 68 [13 - 200]      | 2 [0 - 7]      | 63 [11 - 194]      | 39 [7 - 119]      | 253 [253 - 253]       | 215 [135 - 247]       | 6036 [923 - 21157]  |
| United Republic of Tanzania  | TZA | 52297 [29733 - 80797] | 4575 [886 - 13461] | 142 [22 - 445] | 4177 [711 - 12923] | 695 [130 - 2000]  | 12729 [12729 - 12729] | 12034 [10729 - 12599] | 5009 [900 - 17219]  |
| Uganda                       | UGA | 41067 [23393 - 63339] | 3592 [696 - 10557] | 111 [18 - 350] | 3187 [544 - 9855]  | 908 [165 - 2843]  | 9778 [9778 - 9778]    | 8870 [6935 - 9614]    | 4842 [841 - 16771]  |
| Ukraine                      | UKR | 8284 [4696 - 12831]   | 725 [140 - 2136]   | 22 [4 - 71]    | 672 [114 - 2080]   | 820 [148 - 2514]  | 2140 [2140 - 2140]    | 1320 [-374 - 1992]    | 3708 [-500 - 14997] |
| Uzbekistan                   | UZB | 14922 [8471 - 23085]  | 1305 [253 - 3844]  | 40 [6 - 127]   | 1211 [206 - 3747]  | 1045 [202 - 3081] | 3884 [3884 - 3884]    | 2839 [803 - 3683]     | 4277 [329 - 15791]  |
| Viet Nam                     | VNM | 23357 [13251 - 36156] | 2043 [396 - 6020]  | 63 [10 - 199]  | 1930 [328 - 5978]  | 222 [70 - 520]    | 9059 [9059 - 9059]    | 8837 [8539 - 8990]    | 7927 [1453 - 27285] |
| Yemen                        | YEM | 15419 [8767 - 23822]  | 1349 [261 - 3969]  | 42 [7 - 131]   | 1221 [208 - 3777]  | 636 [137 - 1788]  | 3730 [3730 - 3730]    | 3093 [1942 - 3593]    | 4540 [630 - 16620]  |
| Zambia                       | ZMB | 15795 [8988 - 24384]  | 1382 [268 - 4063]  | 43 [7 - 135]   | 1237 [211 - 3825]  | 846 [220 - 2312]  | 3783 [3783 - 3783]    | 2937 [1471 - 3562]    | 4278 [510 - 15314]  |
| Zimbabwe                     | ZWE | 11180 [6358 - 17270]  | 978 [189 - 2877]   | 30 [5 - 95]    | 869 [148 - 2688]   | 225 [44 - 673]    | 2960 [2960 - 2960]    | 2735 [2287 - 2916]    | 5470 [955 - 19086]  |
| Maternal vs. no intervention |     |                       |                    |                |                    |                   |                       |                       |                     |
| Afghanistan                  | AFG | 15386 [8319 - 24952]  | 1347 [252 - 4009]  | 44 [7 - 139]   | 1271 [209 - 3981]  | 121 [22 - 371]    | 2987 [2987 - 2987]    | 2867 [2617 - 2966]    | 3989 [702 - 13972]  |
| Angola                       | AGO | 10921 [5913 - 17696]  | 956 [179 - 2844]   | 31 [5 - 98]    | 892 [147 - 2795]   | 1535 [282 - 4870] | 2117 [2117 - 2117]    | 582 [-2753 - 1835]    | 1708 [-3054 - 9512] |
| Armenia                      | ARM | 649 [350 - 1056]      | 57 [11 - 169]      | 2 [0 - 6]      | 56 [9 - 175]       | 65 [12 - 194]     | 115 [115 - 115]       | 50 [-79 - 104]        | 1992 [-1307 - 9434] |
| Azerbaijan                   | AZE | 2667 [1439 - 4334]    | 233 [44 - 695]     | 8 [1 - 24]     | 226 [37 - 710]     | 200 [38 - 578]    | 494 [494 - 494]       | 294 [-84 - 456]       | 2692 [-173 - 11244] |
| Burundi                      | BDI | 6596 [3576 - 10679]   | 577 [108 - 1716]   | 19 [3 - 59]    | 530 [87 - 1658]    | 57 [10 - 180]     | 1231 [1231 - 1231]    | 1174 [1051 - 1221]    | 3915 [687 - 13594]  |
| Benin                        | BEN | 6400 [3467 - 10368]   | 560 [105 - 1666]   | 18 [3 - 58]    | 521 [86 - 1632]    | 105 [22 - 317]    | 1166 [1166 - 1166]    | 1061 [849 - 1144]     | 3646 [581 - 12717]  |

|                                  |     |                       |                    |                |                    |                  |                    |                    |                     |
|----------------------------------|-----|-----------------------|--------------------|----------------|--------------------|------------------|--------------------|--------------------|---------------------|
| Burkina Faso                     | BFA | 12405 [6714 - 20105]  | 1086 [203 - 3232]  | 35 [5 - 112]   | 1010 [166 - 3163]  | 237 [41 - 748]   | 2144 [2144 - 2144] | 1907 [1396 - 2103] | 3380 [536 - 12032]  |
| Bangladesh                       | BGD | 46923 [25316 - 76271] | 4107 [767 - 12226] | 133 [20 - 423] | 4011 [655 - 12579] | 882 [244 - 2382] | 9257 [9257 - 9257] | 8374 [6875 - 9012] | 3798 [559 - 13609]  |
| Bolivia                          | BOL | 3626 [1960 - 5884]    | 317 [59 - 945]     | 10 [2 - 33]    | 307 [50 - 962]     | 292 [56 - 829]   | 734 [734 - 734]    | 442 [-95 - 678]    | 2868 [-179 - 11834] |
| Bhutan                           | BTN | 171 [92 - 279]        | 15 [3 - 45]        | 0 [0 - 2]      | 15 [2 - 46]        | 15 [3 - 46]      | 44 [44 - 44]       | 29 [-2 - 41]       | 3865 [-51 - 14507]  |
| Central African Republic         | CAF | 1504 [816 - 2432]     | 132 [25 - 391]     | 4 [1 - 14]     | 118 [19 - 369]     | 17 [3 - 47]      | 290 [290 - 290]    | 273 [242 - 286]    | 4112 [689 - 14375]  |
| Côte d'Ivoire                    | CIV | 12518 [6776 - 20286]  | 1096 [205 - 3261]  | 36 [5 - 113]   | 981 [162 - 3071]   | 344 [71 - 1015]  | 2505 [2505 - 2505] | 2161 [1490 - 2434] | 3979 [561 - 14163]  |
| Cameroon                         | CMR | 10096 [5467 - 16360]  | 884 [165 - 2630]   | 29 [4 - 91]    | 815 [134 - 2553]   | 249 [48 - 713]   | 1772 [1772 - 1772] | 1524 [1060 - 1724] | 3405 [468 - 12218]  |
| Democratic Republic of the Congo | COD | 47712 [25853 - 77274] | 4176 [782 - 12419] | 135 [21 - 430] | 3879 [637 - 12147] | 394 [71 - 1187]  | 9168 [9168 - 9168] | 8774 [7981 - 9097] | 3997 [692 - 13962]  |
| Congo                            | COG | 2469 [1334 - 4007]    | 216 [40 - 643]     | 7 [1 - 22]     | 205 [34 - 642]     | 112 [22 - 320]   | 444 [444 - 444]    | 332 [124 - 422]    | 3037 [263 - 11552]  |
| Comoros                          | COM | 442 [239 - 716]       | 39 [7 - 115]       | 1 [0 - 4]      | 36 [6 - 114]       | 9 [2 - 28]       | 73 [73 - 73]       | 64 [46 - 71]       | 3180 [474 - 11495]  |
| Djibouti                         | DJI | 317 [171 - 514]       | 28 [5 - 83]        | 1 [0 - 3]      | 26 [4 - 81]        | 15 [3 - 44]      | 58 [58 - 58]       | 42 [13 - 55]       | 3086 [223 - 11781]  |
| Eritrea                          | ERI | 2649 [1430 - 4302]    | 232 [43 - 690]     | 8 [1 - 24]     | 220 [36 - 690]     | 23 [7 - 56]      | 470 [470 - 470]    | 448 [415 - 464]    | 3604 [623 - 12546]  |
| Ethiopia                         | ETH | 51208 [27666 - 83117] | 4482 [838 - 13342] | 145 [22 - 461] | 4266 [699 - 13371] | 571 [114 - 1666] | 9121 [9121 - 9121] | 8549 [7455 - 9006] | 3574 [597 - 12446]  |
| Georgia                          | GEO | 870 [469 - 1416]      | 76 [14 - 227]      | 2 [0 - 8]      | 74 [12 - 233]      | 75 [15 - 213]    | 154 [154 - 154]    | 79 [-59 - 139]     | 2226 [-621 - 9633]  |
| Ghana                            | GHA | 12738 [6883 - 20668]  | 1115 [208 - 3319]  | 36 [5 - 115]   | 1044 [171 - 3272]  | 263 [48 - 797]   | 2480 [2480 - 2480] | 2216 [1683 - 2432] | 3821 [600 - 13721]  |
| Guinea                           | GIN | 6655 [3602 - 10788]   | 583 [109 - 1734]   | 19 [3 - 60]    | 544 [89 - 1703]    | 62 [9 - 243]     | 1152 [1152 - 1152] | 1090 [909 - 1143]  | 3591 [574 - 12682]  |
| Gambia                           | GMB | 1352 [731 - 2193]     | 118 [22 - 352]     | 4 [1 - 12]     | 110 [18 - 344]     | 36 [7 - 106]     | 239 [239 - 239]    | 203 [133 - 232]    | 3344 [500 - 12001]  |
| Guinea-Bissau                    | GNB | 878 [476 - 1421]      | 77 [14 - 228]      | 2 [0 - 8]      | 71 [12 - 221]      | 17 [3 - 51]      | 159 [159 - 159]    | 143 [108 - 156]    | 3616 [573 - 12693]  |
| Guyana                           | GUY | 247 [133 - 401]       | 22 [4 - 64]        | 1 [0 - 2]      | 20 [3 - 64]        | 19 [4 - 57]      | 45 [45 - 45]       | 26 [-12 - 41]      | 2488 [-443 - 10211] |
| Honduras                         | HND | 3105 [1675 - 5046]    | 272 [51 - 809]     | 9 [1 - 28]     | 266 [43 - 834]     | 266 [50 - 800]   | 604 [604 - 604]    | 338 [-196 - 553]   | 2549 [-567 - 10639] |

|                                  |     |                          |                      |                   |                      |                      |                       |                       |                    |
|----------------------------------|-----|--------------------------|----------------------|-------------------|----------------------|----------------------|-----------------------|-----------------------|--------------------|
| Haiti                            | HTI | 2493 [1348 - 4043]       | 218 [41 - 650]       | 7 [1 - 22]        | 205 [34 - 643]       | 37 [7 - 109]         | 489 [489 - 489]       | 452 [380 - 482]       | 3938 [654 - 13848] |
| Indonesia                        | IDN | 66946 [36100 - 108869]   | 5860 [1094 - 17443]  | 190 [29 - 603]    | 5622 [920 - 17628]   | 3936 [594 - 13015]   | 13493 [13493 - 13493] | 9557 [478 - 12899]    | 3176 [53 - 12263]  |
| India                            | IND | 375922 [202966 - 610538] | 32904 [6149 - 97946] | 1066 [162 - 3388] | 31613 [5175 - 99111] | 11598 [1760 - 38593] | 67934 [67934 - 67934] | 56336 [29341 - 66174] | 3208 [445 - 11573] |
| Kenya                            | KEN | 21117 [11403 - 34291]    | 1848 [345 - 5502]    | 60 [9 - 190]      | 1762 [289 - 5525]    | 773 [171 - 2231]     | 4023 [4023 - 4023]    | 3251 [1792 - 3852]    | 3391 [425 - 12478] |
| Kyrgyzstan                       | KGZ | 2276 [1227 - 3703]       | 199 [37 - 593]       | 6 [1 - 21]        | 192 [31 - 603]       | 52 [10 - 153]        | 433 [433 - 433]       | 381 [280 - 423]       | 3588 [534 - 12826] |
| Cambodia                         | KHM | 5633 [3038 - 9160]       | 493 [92 - 1468]      | 16 [2 - 51]       | 474 [78 - 1488]      | 195 [35 - 566]       | 1111 [1111 - 1111]    | 917 [545 - 1077]      | 3522 [463 - 12836] |
| Kiribati                         | KIR | 29 [15 - 46]             | 2 [0 - 7]            | 0 [0 - 0]         | 2 [0 - 7]            | 3 [0 - 8]            | 8 [8 - 8]             | 5 [0 - 7]             | Inf [-55 - Inf]    |
| Lao People's Democratic Republic | LAO | 1498 [809 - 2431]        | 131 [25 - 390]       | 4 [1 - 13]        | 125 [21 - 392]       | 55 [11 - 162]        | 375 [375 - 375]       | 320 [213 - 364]       | 4633 [677 - 16788] |
| Liberia                          | LBR | 2501 [1352 - 4057]       | 219 [41 - 652]       | 7 [1 - 23]        | 206 [34 - 646]       | 0 [0 - 1]            | 468 [468 - 468]       | 467 [466 - 468]       | 3988 [724 - 13757] |
| Sri Lanka                        | LKA | 3809 [2051 - 6201]       | 333 [62 - 992]       | 11 [2 - 34]       | 327 [53 - 1027]      | 262 [51 - 757]       | 951 [951 - 951]       | 689 [195 - 900]       | 3990 [253 - 15376] |
| Lesotho                          | LSO | 703 [380 - 1140]         | 62 [12 - 183]        | 2 [0 - 6]         | 55 [9 - 171]         | 21 [4 - 62]          | 124 [124 - 124]       | 103 [62 - 120]        | 3414 [459 - 12516] |
| Republic of Moldova              | MDA | 637 [343 - 1037]         | 56 [10 - 166]        | 2 [0 - 6]         | 54 [9 - 169]         | 38 [7 - 114]         | 121 [121 - 121]       | 83 [7 - 114]          | 2919 [68 - 11422]  |
| Madagascar                       | MDG | 12739 [6877 - 20691]     | 1115 [208 - 3319]    | 36 [5 - 115]      | 1061 [174 - 3327]    | 114 [21 - 343]       | 2380 [2380 - 2380]    | 2266 [2037 - 2360]    | 3788 [652 - 13332] |
| Mali                             | MLI | 11591 [6282 - 18767]     | 1014 [190 - 3016]    | 33 [5 - 105]      | 935 [154 - 2929]     | 157 [32 - 449]       | 2093 [2093 - 2093]    | 1936 [1644 - 2061]    | 3691 [617 - 13037] |
| Myanmar                          | MMR | 9769 [5278 - 15857]      | 855 [160 - 2545]     | 28 [4 - 88]       | 812 [133 - 2545]     | 126 [21 - 397]       | 2490 [2490 - 2490]    | 2364 [2092 - 2468]    | 5160 [895 - 18130] |
| Mongolia                         | MNG | 778 [419 - 1265]         | 68 [13 - 203]        | 2 [0 - 7]         | 65 [11 - 205]        | 46 [9 - 132]         | 211 [211 - 211]       | 165 [79 - 202]        | 4651 [531 - 17283] |
| Mozambique                       | MOZ | 18877 [10225 - 30580]    | 1652 [309 - 4915]    | 54 [8 - 170]      | 1523 [250 - 4770]    | 212 [39 - 642]       | 3330 [3330 - 3330]    | 3117 [2687 - 3291]    | 3634 [622 - 12776] |
| Mauritania                       | MRT | 2334 [1264 - 3783]       | 204 [38 - 608]       | 7 [1 - 21]        | 192 [31 - 600]       | 55 [11 - 159]        | 435 [435 - 435]       | 380 [276 - 424]       | 3581 [522 - 12919] |
| Malawi                           | MWI | 9943 [5378 - 16122]      | 870 [163 - 2591]     | 28 [4 - 90]       | 820 [135 - 2568]     | 107 [18 - 343]       | 1743 [1743 - 1743]    | 1635 [1400 - 1725]    | 3539 [606 - 12298] |
| Niger                            | NER | 16667 [9031 - 26993]     | 1459 [273 - 4338]    | 47 [7 - 150]      | 1357 [223 - 4250]    | 168 [27 - 540]       | 3013 [3013 - 3013]    | 2845 [2473 - 2986]    | 3711 [640 - 13010] |
| Nigeria                          | NGA | 64955 [35207 - 105181]   | 5685 [1065 - 16903]  | 184 [28 - 586]    | 5091 [839 - 15935]   | 1877 [366 - 5545]    | 12392 [12392 - 12392] | 10516 [6847 - 12026]  | 3760 [525 - 13382] |

|                                       |     |                        |                     |                |                     |                    |                       |                      |                      |
|---------------------------------------|-----|------------------------|---------------------|----------------|---------------------|--------------------|-----------------------|----------------------|----------------------|
| Nicaragua                             | NIC | 1902 [1025 - 3094]     | 166 [31 - 495]      | 5 [1 - 17]     | 164 [27 - 514]      | 120 [25 - 335]     | 362 [362 - 362]       | 241 [26 - 337]       | 2816 [89 - 11096]    |
| Nepal                                 | NPL | 8775 [4734 - 14264]    | 768 [143 - 2286]    | 25 [4 - 79]    | 743 [122 - 2331]    | 134 [25 - 393]     | 1633 [1633 - 1633]    | 1499 [1240 - 1608]   | 3601 [602 - 12797]   |
| Pakistan                              | PAK | 85805 [46430 - 139098] | 7510 [1405 - 22357] | 243 [37 - 773] | 7153 [1173 - 22415] | 3213 [451 - 11772] | 14191 [14191 - 14191] | 10978 [2419 - 13740] | 2815 [193 - 10835]   |
| Papua New Guinea                      | PNG | 1811 [979 - 2939]      | 159 [30 - 472]      | 5 [1 - 16]     | 150 [25 - 470]      | 138 [24 - 444]     | 488 [488 - 488]       | 350 [44 - 464]       | 4352 [187 - 16926]   |
| Democratic People's Republic of Korea | PRK | 5369 [2894 - 8736]     | 470 [88 - 1399]     | 15 [2 - 48]    | 455 [74 - 1427]     | 52 [9 - 166]       | 1059 [1059 - 1059]    | 1007 [893 - 1050]    | 3919 [678 - 13755]   |
| Rwanda                                | RWA | 5504 [2973 - 8935]     | 482 [90 - 1434]     | 16 [2 - 50]    | 460 [75 - 1443]     | 100 [19 - 310]     | 1110 [1110 - 1110]    | 1010 [800 - 1091]    | 3922 [645 - 13804]   |
| Sudan                                 | SDN | 20966 [11335 - 34009]  | 1835 [343 - 5463]   | 59 [9 - 189]   | 1732 [284 - 5428]   | 1098 [190 - 3210]  | 3802 [3802 - 3802]    | 2704 [592 - 3612]    | 2945 [152 - 11259]   |
| Senegal                               | SEN | 10462 [5648 - 16994]   | 916 [171 - 2726]    | 30 [5 - 94]    | 875 [143 - 2742]    | 294 [58 - 896]     | 1635 [1635 - 1635]    | 1341 [739 - 1577]    | 2802 [358 - 10338]   |
| Solomon Islands                       | SLB | 165 [89 - 268]         | 14 [3 - 43]         | 0 [0 - 1]      | 14 [2 - 44]         | 20 [4 - 60]        | 42 [42 - 42]          | 22 [-18 - 38]        | 3206 [-1328 - 14425] |
| Sierra Leone                          | SLE | 3665 [1989 - 5932]     | 321 [60 - 953]      | 10 [2 - 33]    | 283 [47 - 886]      | 73 [13 - 231]      | 686 [686 - 686]       | 613 [455 - 674]      | 3849 [624 - 13691]   |
| Somalia                               | SOM | 4997 [2710 - 8087]     | 437 [82 - 1299]     | 14 [2 - 45]    | 399 [66 - 1249]     | 22 [6 - 60]        | 1083 [1083 - 1083]    | 1061 [1024 - 1077]   | 4691 [824 - 16300]   |
| South Sudan                           | SSD | 3646 [1976 - 5904]     | 319 [60 - 949]      | 10 [2 - 33]    | 292 [48 - 915]      | 188 [33 - 566]     | 682 [682 - 682]       | 493 [116 - 648]      | 3165 [211 - 12053]   |
| Sao Tome and Principe                 | STP | 94 [51 - 153]          | 8 [2 - 25]          | 0 [0 - 1]      | 8 [1 - 25]          | 5 [1 - 14]         | 19 [19 - 19]          | 14 [5 - 18]          | Inf [308 - 15869]    |
| Chad                                  | TCD | 7403 [4020 - 11971]    | 648 [122 - 1923]    | 21 [3 - 67]    | 577 [95 - 1805]     | 97 [19 - 293]      | 1367 [1367 - 1367]    | 1270 [1074 - 1348]   | 3922 [643 - 13832]   |
| Togo                                  | TGO | 3413 [1847 - 5534]     | 299 [56 - 889]      | 10 [1 - 31]    | 276 [45 - 865]      | 50 [9 - 147]       | 615 [615 - 615]       | 565 [468 - 605]      | 3642 [613 - 12845]   |
| Tajikistan                            | TJK | 3872 [2090 - 6289]     | 339 [63 - 1009]     | 11 [2 - 35]    | 328 [54 - 1029]     | 93 [17 - 278]      | 744 [744 - 744]       | 651 [466 - 727]      | 3573 [548 - 12768]   |
| Timor-Leste                           | TLS | 535 [289 - 868]        | 47 [9 - 139]        | 2 [0 - 5]      | 45 [7 - 141]        | 27 [4 - 83]        | 129 [129 - 129]       | 102 [46 - 125]       | 4156 [486 - 14997]   |
| United Republic of Tanzania           | TZA | 36017 [19457 - 58458]  | 3153 [589 - 9384]   | 102 [16 - 325] | 3003 [492 - 9412]   | 479 [88 - 1390]    | 6511 [6511 - 6511]    | 6032 [5120 - 6423]   | 3591 [592 - 12641]   |
| Uganda                                | UGA | 28304 [15319 - 45876]  | 2477 [464 - 7374]   | 80 [12 - 255]  | 2292 [377 - 7178]   | 626 [111 - 2043]   | 4994 [4994 - 4994]    | 4368 [2951 - 4883]   | 3415 [529 - 12133]   |
| Ukraine                               | UKR | 5697 [3068 - 9275]     | 499 [93 - 1484]     | 16 [2 - 51]    | 482 [79 - 1513]     | 564 [98 - 1748]    | 1080 [1080 - 1080]    | 515 [-669 - 981]     | 2231 [-1393 - 10453] |

|                                  |     |                       |                   |              |                   |                  |                    |                    |                     |
|----------------------------------|-----|-----------------------|-------------------|--------------|-------------------|------------------|--------------------|--------------------|---------------------|
| Uzbekistan                       | UZB | 10271 [5541 - 16696]  | 899 [168 - 2676]  | 29 [4 - 93]  | 870 [142 - 2728]  | 719 [136 - 2171] | 1966 [1966 - 1966] | 1246 [-206 - 1830] | 2779 [-162 - 11006] |
| Viet Nam                         | VNM | 16069 [8662 - 26141]  | 1407 [263 - 4187] | 46 [7 - 145] | 1387 [226 - 4350] | 153 [47 - 366]   | 4576 [4576 - 4576] | 4423 [4210 - 4529] | 5663 [984 - 19953]  |
| Yemen                            | YEM | 10621 [5738 - 17236]  | 930 [174 - 2767]  | 30 [5 - 96]  | 878 [144 - 2751]  | 439 [91 - 1259]  | 1920 [1920 - 1920] | 1482 [661 - 1829]  | 3162 [329 - 11974]  |
| Zambia                           | ZMB | 10881 [5883 - 17648]  | 952 [178 - 2835]  | 31 [5 - 98]  | 889 [146 - 2787]  | 583 [146 - 1622] | 1932 [1932 - 1932] | 1349 [310 - 1786]  | 2877 [163 - 10872]  |
| Zimbabwe                         | ZWE | 7701 [4162 - 12496]   | 674 [126 - 2006]  | 22 [3 - 69]  | 625 [103 - 1958]  | 155 [29 - 470]   | 1511 [1511 - 1511] | 1356 [1040 - 1481] | 3884 [619 - 13908]  |
| mAb vs. Maternal                 |     |                       |                   |              |                   |                  |                    |                    |                     |
| Afghanistan                      | AFG | 6943 [4474 - 9810]    | 606 [124 - 1698]  | 17 [3 - 51]  | 497 [93 - 1476]   | 55 [11 - 167]    | 2828 [2828 - 2828] | 2773 [2661 - 2817] | 9248 [1859 - 30267] |
| Angola                           | AGO | 4921 [3176 - 6943]    | 430 [88 - 1202]   | 12 [2 - 36]  | 348 [65 - 1035]   | 691 [134 - 2101] | 2002 [2002 - 2002] | 1311 [-100 - 1868] | 6704 [-176 - 24849] |
| Armenia                          | ARM | 295 [189 - 418]       | 26 [5 - 72]       | 1 [0 - 2]    | 22 [4 - 65]       | 30 [6 - 85]      | 112 [112 - 112]    | 83 [28 - 106]      | 6656 [640 - 24639]  |
| Azerbaijan                       | AZE | 1207 [776 - 1710]     | 105 [22 - 295]    | 3 [0 - 9]    | 89 [16 - 264]     | 90 [19 - 252]    | 478 [478 - 478]    | 387 [225 - 459]    | 7604 [1006 - 26767] |
| Burundi                          | BDI | 2969 [1919 - 4183]    | 259 [53 - 725]    | 7 [1 - 22]   | 207 [39 - 614]    | 26 [5 - 77]      | 1165 [1165 - 1165] | 1139 [1088 - 1160] | 9120 [1843 - 29538] |
| Benin                            | BEN | 2883 [1862 - 4066]    | 252 [51 - 704]    | 7 [1 - 21]   | 203 [38 - 604]    | 47 [10 - 135]    | 1095 [1095 - 1095] | 1048 [960 - 1085]  | 8572 [1676 - 28264] |
| Burkina Faso                     | BFA | 5597 [3610 - 7901]    | 489 [100 - 1368]  | 14 [2 - 41]  | 395 [74 - 1173]   | 107 [20 - 321]   | 2053 [2053 - 2053] | 1946 [1732 - 2033] | 8196 [1630 - 26939] |
| Bangladesh                       | BGD | 21257 [13667 - 30107] | 1857 [379 - 5202] | 52 [9 - 157] | 1572 [292 - 4680] | 399 [120 - 987]  | 8786 [8786 - 8786] | 8387 [7800 - 8667] | 8953 [1690 - 29706] |
| Bolivia                          | BOL | 1641 [1056 - 2320]    | 143 [29 - 401]    | 4 [1 - 12]   | 120 [22 - 357]    | 132 [27 - 367]   | 715 [715 - 715]    | 583 [348 - 688]    | 8331 [1200 - 28271] |
| Bhutan                           | BTN | 78 [50 - 110]         | 7 [1 - 19]        | 0 [0 - 1]    | 6 [1 - 17]        | 7 [1 - 19]       | 42 [42 - 42]       | 36 [23 - 41]       | Inf [1709 - 40046]  |
| Central African Republic         | CAF | 675 [437 - 951]       | 59 [12 - 165]     | 2 [0 - 5]    | 46 [9 - 136]      | 7 [2 - 20]       | 270 [270 - 270]    | 262 [250 - 268]    | 9441 [1862 - 29823] |
| Côte d'Ivoire                    | CIV | 5645 [3642 - 7967]    | 493 [101 - 1379]  | 14 [2 - 42]  | 383 [72 - 1138]   | 155 [35 - 437]   | 2371 [2371 - 2371] | 2217 [1934 - 2336] | 9633 [1826 - 31767] |
| Cameroon                         | CMR | 4551 [2937 - 6421]    | 398 [81 - 1111]   | 11 [2 - 34]  | 318 [60 - 945]    | 112 [23 - 313]   | 1703 [1703 - 1703] | 1591 [1390 - 1680] | 8363 [1558 - 27710] |
| Democratic Republic of the Congo | COD | 21485 [13881 - 30291] | 1877 [384 - 5244] | 52 [9 - 158] | 1514 [283 - 4499] | 178 [35 - 518]   | 8667 [8667 - 8667] | 8490 [8149 - 8632] | 9278 [1878 - 30224] |
| Congo                            | COG | 1116 [719 - 1579]     | 97 [20 - 273]     | 3 [0 - 8]    | 80 [15 - 239]     | 51 [11 - 144]    | 430 [430 - 430]    | 380 [286 - 420]    | 7989 [1433 - 26875] |



|                                  |     |                          |                      |                 |                      |                    |                       |                       |                      |
|----------------------------------|-----|--------------------------|----------------------|-----------------|----------------------|--------------------|-----------------------|-----------------------|----------------------|
| Comoros                          | COM | 199 [128 - 281]          | 17 [4 - 49]          | 0 [0 - 2]       | 14 [3 - 42]          | 4 [1 - 12]         | 69 [69 - 69]          | 65 [57 - 68]          | 7697 [1470 - 22663]  |
| Djibouti                         | DJI | 143 [92 - 202]           | 12 [3 - 35]          | 0 [0 - 1]       | 10 [2 - 30]          | 7 [1 - 19]         | 54 [54 - 54]          | 47 [35 - 52]          | Inf [1364 - 25719]   |
| Eritrea                          | ERI | 1199 [772 - 1697]        | 105 [21 - 294]       | 3 [0 - 9]       | 86 [16 - 256]        | 10 [3 - 24]        | 449 [449 - 449]       | 439 [425 - 446]       | 8444 [1693 - 27829]  |
| Ethiopia                         | ETH | 23171 [14917 - 32774]    | 2024 [413 - 5669]    | 57 [10 - 171]   | 1670 [312 - 4964]    | 258 [56 - 728]     | 8579 [8579 - 8579]    | 8321 [7851 - 8523]    | 8281 [1636 - 27108]  |
| Georgia                          | GEO | 395 [254 - 560]          | 34 [7 - 97]          | 1 [0 - 3]       | 29 [5 - 86]          | 34 [7 - 92]        | 151 [151 - 151]       | 117 [59 - 144]        | 6947 [916 - 23984]   |
| Ghana                            | GHA | 5757 [3707 - 8141]       | 503 [103 - 1409]     | 14 [2 - 42]     | 408 [76 - 1214]      | 119 [23 - 346]     | 2367 [2367 - 2367]    | 2248 [2021 - 2344]    | 9173 [1784 - 30212]  |
| Guinea                           | GIN | 3006 [1939 - 4244]       | 263 [54 - 734]       | 7 [1 - 22]      | 213 [40 - 632]       | 28 [4 - 107]       | 1104 [1104 - 1104]    | 1075 [997 - 1099]     | 8426 [1639 - 27512]  |
| Gambia                           | GMB | 611 [393 - 863]          | 53 [11 - 149]        | 1 [0 - 5]       | 43 [8 - 127]         | 16 [4 - 46]        | 228 [228 - 228]       | 212 [182 - 224]       | 8225 [1595 - 27567]  |
| Guinea-Bissau                    | GNB | 395 [256 - 556]          | 35 [7 - 96]          | 1 [0 - 3]       | 28 [5 - 82]          | 8 [1 - 23]         | 148 [148 - 148]       | 140 [125 - 146]       | 8496 [1664 - 28702]  |
| Guyana                           | GUY | 112 [72 - 158]           | 10 [2 - 27]          | 0 [0 - 1]       | 8 [1 - 24]           | 9 [2 - 25]         | 43 [43 - 43]          | 35 [18 - 42]          | Inf [1057 - 30980]   |
| Honduras                         | HND | 1407 [904 - 1992]        | 123 [25 - 344]       | 3 [1 - 10]      | 104 [19 - 310]       | 120 [25 - 341]     | 588 [588 - 588]       | 468 [247 - 564]       | 7709 [1071 - 27121]  |
| Haiti                            | HTI | 1126 [726 - 1591]        | 98 [20 - 275]        | 3 [0 - 8]       | 80 [15 - 238]        | 17 [3 - 47]        | 465 [465 - 465]       | 448 [418 - 462]       | 9282 [1848 - 30418]  |
| Indonesia                        | IDN | 30342 [19498 - 42993]    | 2651 [541 - 7425]    | 74 [13 - 224]   | 2204 [410 - 6563]    | 1783 [293 - 5590]  | 13137 [13137 - 13137] | 11354 [7546 - 12844]  | 8672 [1446 - 29332]  |
| India                            | IND | 170064 [109420 - 240709] | 14856 [3030 - 41609] | 415 [70 - 1254] | 12375 [2304 - 36811] | 5241 [865 - 17119] | 64809 [64809 - 64809] | 59568 [47690 - 63944] | 8012 [1574 - 26597]  |
| Kenya                            | KEN | 9551 [6146 - 13516]      | 834 [170 - 2336]     | 23 [4 - 70]     | 690 [128 - 2051]     | 349 [85 - 942]     | 3842 [3842 - 3842]    | 3493 [2900 - 3758]    | 8500 [1565 - 28616]  |
| Kyrgyzstan                       | KGZ | 1032 [663 - 1463]        | 90 [18 - 253]        | 3 [0 - 8]       | 75 [14 - 224]        | 24 [5 - 67]        | 424 [424 - 424]       | 401 [358 - 420]       | 8897 [1729 - 29555]  |
| Cambodia                         | KHM | 2554 [1641 - 3619]       | 223 [46 - 625]       | 6 [1 - 19]      | 186 [35 - 554]       | 88 [17 - 248]      | 1085 [1085 - 1085]    | 997 [837 - 1068]      | 8967 [1706 - 29648]  |
| Kiribati                         | KIR | 13 [8 - 18]              | 1 [0 - 3]            | 0 [0 - 0]       | 1 [0 - 3]            | 1 [0 - 3]          | 7 [7 - 7]             | 6 [4 - 7]             | NaN [1795 - Inf]     |
| Lao People's Democratic Republic | LAO | 677 [435 - 958]          | 59 [12 - 166]        | 2 [0 - 5]       | 49 [9 - 146]         | 25 [5 - 70]        | 357 [357 - 357]       | 332 [287 - 352]       | 11358 [2146 - 38175] |
| Liberia                          | LBR | 1130 [728 - 1597]        | 99 [20 - 276]        | 3 [0 - 8]       | 81 [15 - 240]        | 0 [0 - 1]          | 448 [448 - 448]       | 448 [447 - 448]       | 9183 [1866 - 29848]  |
| Sri Lanka                        | LKA | 1730 [1110 - 2453]       | 151 [31 - 423]       | 4 [1 - 13]      | 129 [24 - 383]       | 119 [26 - 342]     | 942 [942 - 942]       | 823 [600 - 916]       | 10845 [1804 - 36357] |

|                                       |     |                       |                   |               |                   |                   |                       |                      |                      |
|---------------------------------------|-----|-----------------------|-------------------|---------------|-------------------|-------------------|-----------------------|----------------------|----------------------|
| Lesotho                               | LSO | 317 [205 - 448]       | 28 [6 - 78]       | 1 [0 - 2]     | 21 [4 - 64]       | 10 [2 - 27]       | 119 [119 - 119]       | 110 [92 - 117]       | 8565 [1622 - 28575]  |
| Republic of Moldova                   | MDA | 289 [186 - 410]       | 25 [5 - 71]       | 1 [0 - 2]     | 21 [4 - 63]       | 17 [3 - 49]       | 119 [119 - 119]       | 102 [70 - 116]       | 8147 [1399 - 27702]  |
| Madagascar                            | MDG | 5769 [3712 - 8167]    | 504 [103 - 1411]  | 14 [2 - 42]   | 416 [78 - 1237]   | 52 [10 - 146]     | 2294 [2294 - 2294]    | 2242 [2147 - 2283]   | 8944 [1784 - 29203]  |
| Mali                                  | MLI | 5221 [3375 - 7359]    | 456 [93 - 1274]   | 13 [2 - 39]   | 365 [68 - 1086]   | 71 [16 - 195]     | 1957 [1957 - 1957]    | 1886 [1762 - 1941]   | 8575 [1696 - 28124]  |
| Myanmar                               | MMR | 4413 [2841 - 6243]    | 385 [79 - 1079]   | 11 [2 - 33]   | 317 [59 - 943]    | 57 [11 - 180]     | 2390 [2390 - 2390]    | 2333 [2210 - 2380]   | 12185 [2463 - 39539] |
| Mongolia                              | MNG | 353 [226 - 500]       | 31 [6 - 86]       | 1 [0 - 3]     | 26 [5 - 76]       | 21 [4 - 58]       | 208 [208 - 208]       | 187 [150 - 203]      | 12312 [2271 - 40125] |
| Mozambique                            | MOZ | 8501 [5489 - 11990]   | 743 [152 - 2076]  | 21 [4 - 63]   | 595 [111 - 1767]  | 95 [19 - 282]     | 3202 [3202 - 3202]    | 3107 [2921 - 3184]   | 8659 [1754 - 28261]  |
| Mauritania                            | MRT | 1051 [678 - 1483]     | 92 [19 - 257]     | 3 [0 - 8]     | 75 [14 - 222]     | 25 [5 - 70]       | 411 [411 - 411]       | 386 [341 - 406]      | 8633 [1666 - 28787]  |
| Malawi                                | MWI | 4480 [2888 - 6327]    | 391 [80 - 1095]   | 11 [2 - 33]   | 320 [60 - 950]    | 48 [9 - 150]      | 1667 [1667 - 1667]    | 1619 [1517 - 1658]   | 8387 [1691 - 27573]  |
| Niger                                 | NER | 7517 [4857 - 10597]   | 657 [134 - 1835]  | 18 [3 - 56]   | 530 [99 - 1576]   | 76 [13 - 238]     | 2792 [2792 - 2792]    | 2716 [2554 - 2779]   | 8482 [1703 - 27770]  |
| Nigeria                               | NGA | 29264 [18918 - 41248] | 2556 [523 - 7141] | 71 [12 - 216] | 1988 [373 - 5906] | 844 [178 - 2360]  | 11329 [11329 - 11329] | 10485 [8969 - 11151] | 8818 [1660 - 29080]  |
| Nicaragua                             | NIC | 863 [554 - 1223]      | 75 [15 - 211]     | 2 [0 - 6]     | 64 [12 - 191]     | 55 [12 - 149]     | 356 [356 - 356]       | 302 [207 - 344]      | 7975 [1319 - 27058]  |
| Nepal                                 | NPL | 3975 [2555 - 5630]    | 347 [71 - 973]    | 10 [2 - 29]   | 291 [54 - 868]    | 61 [12 - 174]     | 1573 [1573 - 1573]    | 1512 [1399 - 1561]   | 8634 [1701 - 28312]  |
| Pakistan                              | PAK | 38637 [24917 - 54545] | 3375 [690 - 9440] | 94 [16 - 285] | 2791 [520 - 8297] | 1445 [224 - 5285] | 12967 [12967 - 12967] | 11523 [7682 - 12744] | 6917 [1179 - 22604]  |
| Papua New Guinea                      | PNG | 818 [527 - 1157]      | 71 [15 - 200]     | 2 [0 - 6]     | 59 [11 - 175]     | 62 [12 - 193]     | 473 [473 - 473]       | 410 [280 - 461]      | 11772 [2074 - 39852] |
| Democratic People's Republic of Korea | PRK | 2436 [1565 - 3454]    | 213 [44 - 597]    | 6 [1 - 18]    | 178 [33 - 531]    | 24 [5 - 73]       | 1030 [1030 - 1030]    | 1007 [957 - 1026]    | 9351 [1889 - 30820]  |
| Rwanda                                | RWA | 2488 [1602 - 3521]    | 217 [44 - 609]    | 6 [1 - 18]    | 180 [33 - 536]    | 45 [9 - 130]      | 1072 [1072 - 1072]    | 1027 [942 - 1063]    | 9480 [1876 - 31129]  |
| Sudan                                 | SDN | 9469 [6101 - 13382]   | 827 [169 - 2315]  | 23 [4 - 70]   | 677 [126 - 2012]  | 495 [90 - 1424]   | 3616 [3616 - 3616]    | 3121 [2192 - 3526]   | 7787 [1318 - 25824]  |
| Senegal                               | SEN | 4735 [3047 - 6703]    | 414 [84 - 1159]   | 12 [2 - 35]   | 342 [64 - 1019]   | 133 [29 - 394]    | 1555 [1555 - 1555]    | 1422 [1161 - 1527]   | 6957 [1269 - 23333]  |
| Solomon Islands                       | SLB | 75 [48 - 106]         | 7 [1 - 18]        | 0 [0 - 1]     | 5 [1 - 16]        | 9 [2 - 26]        | 41 [41 - 41]          | 31 [14 - 39]         | Inf [1189 - 37242]   |

|                             |     |                       |                   |              |                   |                |                    |                    |                      |
|-----------------------------|-----|-----------------------|-------------------|--------------|-------------------|----------------|--------------------|--------------------|----------------------|
| Sierra Leone                | SLE | 1648 [1066 - 2320]    | 144 [29 - 402]    | 4 [1 - 12]   | 111 [21 - 328]    | 33 [6 - 99]    | 653 [653 - 653]    | 620 [553 - 647]    | 9278 [1833 - 30326]  |
| Somalia                     | SOM | 2248 [1454 - 3166]    | 196 [40 - 548]    | 5 [1 - 17]   | 156 [29 - 462]    | 10 [3 - 26]    | 1006 [1006 - 1006] | 996 [981 - 1003]   | 10581 [2129 - 34505] |
| South Sudan                 | SSD | 1642 [1061 - 2314]    | 143 [29 - 401]    | 4 [1 - 12]   | 114 [21 - 339]    | 85 [16 - 240]  | 641 [641 - 641]    | 556 [401 - 624]    | 8210 [1411 - 27153]  |
| Sao Tome and Principe       | STP | 43 [27 - 60]          | 4 [1 - 10]        | 0 [0 - 1]    | 3 [0 - 9]         | 2 [0 - 6]      | 18 [18 - 18]       | 16 [12 - 18]       | Inf [1629 - Inf]     |
| Chad                        | TCD | 3326 [2155 - 4679]    | 290 [59 - 810]    | 8 [1 - 24]   | 225 [42 - 668]    | 44 [9 - 125]   | 1258 [1258 - 1258] | 1214 [1132 - 1249] | 8956 [1754 - 29452]  |
| Togo                        | TGO | 1540 [993 - 2175]     | 135 [27 - 376]    | 4 [1 - 12]   | 108 [20 - 321]    | 23 [5 - 64]    | 573 [573 - 573]    | 550 [509 - 568]    | 8460 [1674 - 27814]  |
| Tajikistan                  | TJK | 1752 [1127 - 2480]    | 153 [31 - 429]    | 4 [1 - 13]   | 128 [24 - 382]    | 42 [8 - 123]   | 723 [723 - 723]    | 681 [601 - 715]    | 8838 [1721 - 29013]  |
| Timor-Leste                 | TLS | 242 [156 - 342]       | 21 [4 - 59]       | 1 [0 - 2]    | 18 [3 - 52]       | 12 [2 - 36]    | 124 [124 - 124]    | 112 [88 - 122]     | 10728 [1983 - 37854] |
| United Republic of Tanzania | TZA | 16279 [10480 - 23026] | 1422 [290 - 3982] | 40 [7 - 120] | 1175 [219 - 3492] | 216 [43 - 624] | 6219 [6219 - 6219] | 6003 [5595 - 6176] | 8501 [1674 - 27856]  |
| Uganda                      | UGA | 12764 [8233 - 18017]  | 1115 [227 - 3119] | 31 [5 - 94]  | 895 [167 - 2660]  | 283 [53 - 864] | 4784 [4784 - 4784] | 4502 [3921 - 4732] | 8357 [1657 - 27613]  |
| Ukraine                     | UKR | 2587 [1660 - 3669]    | 226 [46 - 633]    | 6 [1 - 19]   | 189 [35 - 565]    | 256 [48 - 768] | 1061 [1061 - 1061] | 805 [293 - 1012]   | 7323 [823 - 25745]   |
| Uzbekistan                  | UZB | 4651 [2990 - 6588]    | 406 [83 - 1138]   | 11 [2 - 34]  | 341 [64 - 1014]   | 325 [65 - 937] | 1918 [1918 - 1918] | 1593 [981 - 1853]  | 7955 [1229 - 26787]  |
| Viet Nam                    | VNM | 7288 [4682 - 10330]   | 637 [130 - 1784]  | 18 [3 - 54]  | 544 [101 - 1621]  | 69 [23 - 157]  | 4483 [4483 - 4483] | 4414 [4327 - 4460] | 13485 [2691 - 43993] |
| Yemen                       | YEM | 4798 [3089 - 6786]    | 419 [86 - 1174]   | 12 [2 - 36]  | 343 [64 - 1020]   | 198 [45 - 540] | 1809 [1809 - 1809] | 1611 [1269 - 1764] | 7933 [1391 - 26692]  |
| Zambia                      | ZMB | 4914 [3166 - 6944]    | 429 [88 - 1201]   | 12 [2 - 36]  | 348 [65 - 1034]   | 263 [72 - 702] | 1851 [1851 - 1851] | 1588 [1149 - 1779] | 7725 [1302 - 26228]  |
| Zimbabwe                    | ZWE | 3479 [2241 - 4920]    | 304 [62 - 851]    | 8 [1 - 26]   | 244 [46 - 727]    | 70 [14 - 202]  | 1449 [1449 - 1449] | 1379 [1246 - 1435] | 9375 [1836 - 30763]  |

266 Country-specific estimated mean [95% credible interval] of undiscounted number of RSV cases, hospital admissions, deaths and discounted costs (in thousand) and DALY averted, average cost-  
267 effectiveness ration in 2020. Costs are presented in USD 2016 values. Discount rate is 3% per year
